# Supplementary material for: Computational Prediction and Experimental Verification of New MAP Kinase Docking Sites and Substrates Including Gli Transcription Factors
Source: PLOS journal article supplement (doi:10.1371/journal.pcbi.1000908), 2010-08-26
Supplement: S2 (10.1371/journal.pcbi.1000908.s002) [file journal.pcbi.1000908.s002]

301 Moved Permanently

# Moved Permanently

The document has moved here.

---

Apache Server at www.ploscompbiol.org Port 80
