# Supplementary material for: Computational Prediction and Experimental Verification of New MAP Kinase Docking Sites and Substrates Including Gli Transcription Factors
Source: PLoS Comput Biol. 2010 Aug 26;6(8):e1000908. doi: 10.1371/journal.pcbi.1000908 (PMC2928751; doi:10.1371/journal.pcbi.1000908)
Supplement: Table S1 — List of top D-finder predictions. (0.22 MB XLS) [file pcbi.1000908.s001.xls]

## Sheet: Table 1
Whisentant et al. 2010 Supplementary Table 1. List of Top D-finder Predictions
Rank	Score	NCBI ID	Name	Predicted D-site	Notes
1	2.43259e-14	NM_005456	JIP1	SGDTYRPKRPTTLNLFPQV
2	7.68593e-15	NM_015133	JIP3	SSLPGRRKERPTSLNVFPL
3	3.32721e-17	NM_012324	JIP2	VEEPHKHRPTTLRLTTLGA
4	2.54951e-18	NM_000168	GLI3	PRLSARPSRKRTLSISPLS
5	1.9582e-18	NM_145185	MKK7	DISPQRPRPTLQLPLANDG
6	1.78372e-18	NM_006856	ATF2	HLAVHKHKHEMTLKFGPAR
7	1.0448e-18	NM_001114123	ELK1	ISQPQKGRKPRDLELPLSP
8	5.4852e-19	NM_024608	NEIL1	ISASARGKELRLILSPLPG
9	3.68148e-19	AAI17675	NFASC	ALPKGRPDRPRDLELTDLA
10	3.00365e-19	NM_025049	PIF1	FYATLRRGRSLSLESPDDD
11	1.65626e-19	NM_020888	KIA1522	SGKSGRRRRERRSTVLGLP
12	1.53964e-19	NM_003010	MKK4	SSMQGKRKALKLNFANPPF
13	9.43972e-20	NM_001007561	IRGQ	PTALARRERALGLASGELA
14	8.04019e-20	EU165354	HTR3E	VPSPGSHRDHSLPLGPLMD
15	7.53472e-20	NM_001130924	TMEM201	SSLPGRLSRALSLGTIPSL
16	6.05821e-20	NM_173164	NFAT4	REFLERPSRDHLYLPLEPS
17	4.37774e-20	NM_003971	SPAG9	HSRIRKERPISLGIFPLPA
18	4.27215e-20	NM_014727	MLL4	DEVQLRSTRRATSLELPMA
19	3.93289e-20	NM_004844	SAB	FPAVVRPGSLDLPSPVSLS
20	3.6669e-20	NM_001081573	GAB3	DLKPQRKSRPPPLDLRNLS
21	3.37547e-20	NM_004285	H6PD	PSQPHRRMSLSLPLINRAK
22	3.36048e-20	NM_014935	PLEKHA6	GSMREKRRSLQLPASPAPD
23	3.35944e-20	NM_022095	ZF335	SSPPATSKALGLAVPPSPP
24	3.29582e-20	NM_052966	FAM129A	PSSLAKGESLSLPGPSPPP
25	2.55901e-20	NM_018657	MYNN	ETMDVKPSDMTLPLALPLG
26	2.38347e-20	NM_014510	PICLO	ASSSARTKPTSLPISQSRG
27	2.28358e-20	NM_000045	ARG1	SYLLGRKKRPIHLSFDVDG
28	2.03176e-20	NM_015267	CUX2	ASESSRCSLEVSLNSPSAA
29	1.77972e-20	NM_181523	PI3KR1	SPPTPKPRPPRPLPVAPGS
30	1.58916e-20	NM_138420	AHNAK2	PSMQGDLKTTDLSIQPLSA
31	1.49883e-20	NM_012166	FBOX10	FSLFRRRRERRTLSVGPGR
32	1.47732e-20	NM_013270	TSP50	ALALPAPSRTLLLALPLPL
33	1.47044e-20	NM_013275	ANKRD11	QLVRARPRSPDLPLTLGAP	questionable
34	1.40644e-20	NM_012318	LETM1	PTSLLILSRAMYLPDTLSP
35	1.36079e-20	NM_015446	AHCTF1	SKASQKISRLLDLVVQPVP
36	1.24611e-20	NM_205855	FAM180A	FPAAHRPKRSSSLPLNPVL
37	1.2118e-20	NM_138368	DKFZp761E198	CLCPGRPARPLLLPLQPRC
38	1.20888e-20	NM_001079855	GYG2	SLPEGRRSEDVDLAVSVSQ
39	1.18914e-20	NM_001024593	ZMYND17	RLLTDVLSRPLTLGLGLRA
40	1.14251e-20	NM_005128	DOPEY2	SSLLGVLKESVQLNLAPPG
41	1.11735e-20	NM_138459	NUS1	QLVAQKQKRPTDLDVDTLA
42	1.06224e-20	NM_033394	TANC1	RVSLAKGVSMSLPSSPLLP
43	1.03788e-20	NM_018490	LGR4	SISPEIMKSVTLIFFPLPA
44	9.77807e-21	NM_138477	CDAN1	SGSPSRPSLTLSDPPNLSN
45	8.78017e-21	NM_006203	PDE4D	SENIQRPTSLPLKILPLIA
46	8.66711e-21	NM_002600	PDE4B	TPEGDGISRPTTLPLTTLP
47	8.39333e-21	NM_001009944	PKD1	PSRLARASRGVDLATGPSR
48	8.31363e-21	NM_001105203	RUSC1	HELAQKRKRGPGLPLVPQA
49	8.1528e-21	NM_138440	VASN	PVTPRPPRSLTLGIEPVSP
50	7.88501e-21	NM_019619	PARD3	FVKTRKSKSMDLGSSPSRD
51	7.71211e-21	NM_144625	WDR64	SLPIYSISSPTSLRFLPLI
52	7.67448e-21	NM_002286	LAG3	SSWGPRPRRYTVLSVGPGG
53	7.51429e-21	NM_080686	BAT2	SLHPYRSQPLYLPPGPAPP
54	6.60183e-21	NR_003587	MYO15B	PEVPARPSLTLPADIDLFP
55	6.34078e-21	NM_016148	SHANK1	SPAPRPSSLPILPSGPLYP
56	6.32383e-21	NM_015493	KANK2	HPTAGRGRSELCLDLPDPP
57	5.71994e-21	NM_054114	TAGAP	PAVQGKTKRPVDLKIKNLA
58	5.18701e-21	NM_004238	TRIP12	SPSLQHSRDDSLDLSPQGR
59	5.10457e-21	NM_015559	SETBP1	NPFPAKPGSLTLPFHSEPA
60	4.91384e-21	NM_005027	PIK3R2	ALYPFRRERPEDLELLPGD
61	4.53558e-21	NM_152629	GLIS3	RSHSARSKKRALSLSPLSD
62	4.50396e-21	NM_001369	DNAH5	RLELWLRSRPTGTLELPPP
63	4.4728e-21	NM_001080397	SLC45A1	PRSSGILKRPQTLAIPDAA
64	3.78102e-21	NM_032789	PARP10	ALASPRPDRALVQLPKPLS
65	3.41742e-21	NM_001001872	C14orf37	HVAQARLKLLGLRSLPASA	questionable
66	3.40095e-21	NM_001103175	CCDC64B	ELLLLRRERREHSLELERA
67	3.39481e-21	NM_032349	NUDT16L1	VEISAVHSRDHGLEVGPPP
68	3.38932e-21	NM_025135	FHOD3	SRSVSRGRADLSLDLTSPA
69	3.35004e-21	NM_015254	KIF13B	ATGPVRRRSTGLRLGAPEA
70	3.32165e-21	NM_019858	GPR162	ASPGHSPRRPRPLGLSPRR
71	3.29603e-21	NM_002714	PPP1R10	APSHAKFRSTGLELETPSL
72	3.04812e-21	NM_178449	PTH2	DPATPRPRRSLALADDAAF
73	3.02788e-21	NM_021120	DLG3	YLKVAKPGSLHLNDMYAPP
74	2.94899e-21	NM_212557	AMTN	RSLPLKPALGLPPTKLAPD
75	2.94365e-21	NM_003791	MBTPS1	SSRPLRRASLSLGSGFWHA
76	2.84507e-21	NM_004414	RCAN1	AEARARPGVTLRPFAPLSG
77	2.81686e-21	NM_133644	GTPBP3	DLPLARHASLRLLSDPRSG
78	2.71366e-21	NM_022365	DNAJC1	AQLPGRRQLGLVPFPPPPP
79	2.69177e-21	NM_024742	ARMC5	PTPPVRLRKTLDLALSILA
80	2.63262e-21	NM_013261	PPARGC1A	QHLQAKPTTLSLPLTPESP
81	2.51681e-21	NM_016155	MMP17	APAPAPRAEDLSLGVEWLS
82	2.50934e-21	NM_002228	c-JUN	NPKILKQSMTLNLADPVGS
83	2.44956e-21	NM_001127464	ZNF469	CPARGRPKTRSLGLAPTEA
84	2.3206e-21	NM_018028	SAMD4B	HPSPLKRSMSLIPTSPQVP
85	2.27249e-21	NM_003635	NDST2	VSTSPKAKEPLPLPLGDCS
86	2.22454e-21	NM_001025595	ARFIP1	SEKLGRGSRTVDLELEAQI
87	2.20977e-21	NM_032753	RAX2	ALPFARPPAMSLPLEPWLG
88	2.15789e-21	NM_181453	GCC2	SLKNLRERRNTDLPLLDMH
89	2.14472e-21	NM_012278	ITGB1BP2	TLRRERPKSELPLKLLPLN
90	2.1415e-21	NM_012213	MLYCD	PGLTARRLLPLRLPPRPPG
91	2.0992e-21	NM_007335	DLEC1	YSFAARPRRLTQLALAQRP
92	2.08576e-21	NM_006699	MAN1A2	ALLPLSGRRIPPLNLGPPS
93	2.06472e-21	NM_207362	C2orf55	NPFPVKLRSTSLSLKYRDG
94	2.02874e-21	NM_022455	NSD1	STPESRHGAVKSPFLPLAP
95	2.01017e-21	NM_022898	BCL11B	NSAAKRIKVEKDLELPPAA
96	1.98516e-21	NM_138344	FAM181A	RGSEDRPRRLLLDLGPDSS
97	1.95276e-21	NM_013247	HTRA2	VSSAQRPARDLGLPQTNVE
98	1.91109e-21	NM_015678	NBEA	EPHPPRSSAMHLCFLPQSP
99	1.86873e-21	NM_001042410	ANKZF1	APSPADPRVLSLLSAPLGS
100	1.81015e-21	NM_001172	ARG2	DLLIGKRQRPIHLSFDIDA
101	1.77142e-21	NM_001001524	TM6SF2	PPLAGKIAALSLSALPVSY
102	1.72696e-21	NM_138425	C12orf57	ASLSGKLKALFLPPMTLPP
103	1.63069e-21	NM_001014809	CRMP1	RPPTLRIRRPAPRDLPLGR
104	1.62138e-21	NM_017431	PRKAG3	PVDVSRSRSMRLNNIRLRP	questionable
105	1.61047e-21	NM_020144	PAPOLB	NPVLLKEPEERNLNLPVWD
106	1.52802e-21	NM_001014440	ODF3L3	SHDRARHRRRPRLLHLRPP	questionable
107	1.50201e-21	NM_172312	SPAG8	STEGSRSRSRSLDIQPSSE
108	1.49956e-21	NM_004145	MYO9B	SPRPGQLERPTSLALDSRV
109	1.40992e-21	NM_173540	FUT11	DYMTEKLWRPMHLGAVPVY
110	1.39033e-21	NM_018557	LRP1B	ILVSKRLKFPRDLSLDPQA
111	1.34465e-21	NM_017671	FERMT1	KILNIRRSEELSLLKPSGD
112	1.3301e-21	NM_030958	SLCO5A1	SYFGGRGRRPLWLAVGGLL
113	1.31417e-21	NM_012402	ARFIP2	SERFGRGSRTVDLELELQI
114	1.29639e-21	NM_024345	DCAF10	SLSPAPRSGELGLPGAPES
115	1.29049e-21	NM_002956	CLIP1	SSVSSRPSRTGLHVLELEA
116	1.26753e-21	NM_001109760	C17orf70	VDQLGPGARREVTLPLGPG
117	1.23282e-21	NM_015440	MTHFD1L	REQQHRRWRLHCLKLQPLS
118	1.21852e-21	NM_173157	NR4A1	PLTPEFIKPTMDLASPEAA
119	1.21768e-21	NM_022904	RASAL3	ALPPARRLSLRLRGLGPGS
120	1.17533e-21	NM_006285	TESK1	DPRLSRSRSDLFLPPSPES
121	1.17276e-21	NM_001029875	RGS7BP	KNLLSKLRETMPLPLKNQD
122	1.16611e-21	NM_018183	SBNO1	RAKNQRRRVHMTLELPWSA
123	1.16057e-21	NM_001099856	IKBKG	ESPLGKPAMLHLPSEQGAP
124	1.13524e-21	NM_020946	DENND1A	PPAVAPSRIRTLPLARSSA
125	1.11544e-21	NM_001034954	SORBS1	SLTVGVPGRRSLALTPPLP
126	1.10496e-21	NM_014806	RUSC2	VLRYSKEQRPTTLPIQPFV
127	1.09749e-21	NM_173691	C9ORF75	PPPEGRQSVELPKGDLGPA
128	1.09101e-21	NM_001048200	HIPK3	ATALKKLKSLGLIHADLKP
129	1.08873e-21	NM_015114	ANKLE2	DYFPSPSKTSLPLSPVKTA
130	1.08524e-21	NM_000094	COL7A1	AEATRRVLERLVLALGPLG
131	1.08502e-21	NM_030764	FCRL2	RIPVSRPVLTLRSPGAQAA
132	1.06812e-21	NM_003502	AXIN1	STATPRRSDLDLGYEPEGS
133	1.06393e-21	NM_007286	SYNPO	AASPAKPSSLDLVPNLPKG
134	1.06056e-21	NM_006547	IGF2BP3	PGSVSKQKPCDLPLRLLVP
135	1.05898e-21	NM_004761	RGL2	PQAPDLPKPLALPGDPPAD
136	1.05395e-21	NM_022490	POLRE1	SEEDHKLGTLSLPLPPAQT
137	1.04978e-21	NM_020236	MRPL1	INEVCRHRPLNLGPFVVRA
138	1.01884e-21	NM_001129831	CACNA1C	GSSAARRVRPVSLMVPSQA
139	9.76284e-22	NM_020528	PCBP3	SPATSKPPVTLRLVVPASQ
140	9.57482e-22	NM_172020	POM121	QLLPSRRGEQLTLPPPPQL
141	9.15203e-22	NM_144781	PDCD2	AWPPGRLPPLHLPLLLPRA
142	8.85783e-22	NM_018067	MAP7D1	LSFLARSRSAVTLPRNGRD
143	8.63069e-22	NM_022041	GAN	ELSPQKLKEVISLEKLNVG
144	8.62197e-22	NM_020856	TSHZ3	IPATRKKASLELELPSSPD
145	8.57241e-22	NM_006314	CNKSR1	VLDSPHQRSPSLSLAPLSP
146	8.5231e-22	NM_022151	MOAP1	AGAVHKTIRRELNLPEDGP
147	8.37106e-22	NM_181718	ASPHD1	VLGIQRPGLLFLPDLPSAP
148	8.28714e-22	NM_001080429	KIAA1543	SPRSPKHTRPAELRLAPLT
149	8.17412e-22	NM_005932	MIPEP	HLDKEKRKRAVDLNVKILD
150	8.0907e-22	NM_006461	SPAG5	MLENLRQSLSLPSMLRDAA
151	7.90812e-22	NM_015608	C10orf137	RTAFARLEEKTDLKLPPAN
152	7.84476e-22	NM_002891	RASGRF1	ITKTSSPSRRRKLSLNIPI
153	7.77784e-22	NM_002229	JUNB	DYKLLKPSLAVNLADPYRS
154	7.43828e-22	NM_006032	CPNE6	SSASHPPKSDLRLPPFDVL	questionable
155	7.41935e-22	NM_004717	DGKI	ANMVQKSKRRTSMPLLNDP
156	7.41889e-22	NM_032827	ATOH8	NNRTGRRKSWRLEFLFLRR
157	7.4173e-22	NM_001105562	UBE4B	PSATSRRPSSLRISPSLGA
158	7.33499e-22	NM_153449	SLC2A14	VSLTSRMKPHTLAVTPALI
159	7.2341e-22	NM_016436	PHF20	NGAVEKPRPLALPLPRSVE
160	7.22818e-22	NM_031925	TMEM120A	SQSAAREQEGLRLGLPLPA	questionable
161	7.22174e-22	NM_006439	MAB21L2	CLSVLKTLRDRHLELPGQP
162	7.13561e-22	NM_138471	C11orf84	PSLPKRSRPRGLRPLELPA
163	7.05054e-22	NM_001039464	C1orf175	SEAPGKDSREMMQLASEVM
164	6.97154e-22	NM_003573	LTBP4	SPSPSVRKRQVSLNWQPLT
165	6.9263e-22	NM_005144	HR	AGPGLRKGLGLPLSPVRPR
166	6.90284e-22	NM_024098	CCDC86	AASPQRQQDLHLESPQRQP
167	6.74552e-22	NM_015342	PPWD1	FHSTLRHDRPYTLSMANAG
168	6.64838e-22	NM_006342	TACC3	ESALRKQSLYLKFDPLLRD
169	6.6317e-22	NM_014807	C2CD2L	ALDLGPQSRELTLKVLRSS
170	6.62362e-22	NM_182684	UPK3B	ALNCLRPSLSLELVPYTPQ
171	6.58523e-22	NM_001014442	PCOTH	PGKPVGPKGPMLPLGPSGP
172	6.58343e-22	NM_003086	SNAPC4	PSGTQEPRGPLGLEKLPLR
173	6.56004e-22	NM_020400	LPAR5	ATQSQRRRKTVRLLLANLV
174	6.46347e-22	NM_004904	CREB5	HLMIHRHKHEMTLKFPSIK
175	6.42079e-22	NM_015902	UBR5	RSSLSRLGSSRVLLLPLER
176	6.29152e-22	NM_012341	GTPBP4	ETEESRKKRERDLELEMGD
177	6.27552e-22	NM_018979	WNK1	HEKTSRPKLRILNVSNKGD
178	6.07902e-22	NM_004864	GDF15	SWDVTRPLRRQLSLARPQA
179	5.95551e-22	NM_024101	MLPH	VKPSGKPRRKSNLPIFLPR
180	5.86317e-22	NM_006017	PROM1	SSELESLKVNLNIFLLGAA
181	5.75167e-22	NM_005056	KDM5A	KELIEKEKEKDLDLEPLSD
182	5.66849e-22	NM_001988	EVPL	DEEVGRRRQLELEVQQLRA
183	5.58387e-22	NM_021147	CCNO	ADRMLRVSRPVDLRLGDHP
184	5.56905e-22	NM_175709	CBX7	NLESHSHRRELFLQEPPAP
185	5.55668e-22	NM_014225	PPP2R1A	AGSGGRGRRPISLRLNSIK
186	5.51728e-22	NM_024953	C12orf30	ETLWLRIRSLTLRLISGLP
187	5.50922e-22	NM_014963	SBNO2	RVQNQRRRVHMTLELPWSA
188	5.50263e-22	NM_033130	SIGLEC10	SSHPWGPRPLGLELPGVKA
189	5.43169e-22	NM_001013736	FAM47C	HLEPPKTRRVSSLRLEPPK
190	5.41886e-22	NM_001010903	C6orf222	SPEARRPKRPSFLPLCVGG
191	5.38566e-22	NM_022836	DCLRE1B	EFISQKTREEIGLGSPLVP
192	5.31459e-22	NM_173075	APBB2	EGATLRYASLKLRNAPHPD
193	5.16439e-22	NM_018968	SNTG2	GSHQGRNRRTVTLRRQPVG
194	5.08021e-22	NM_173569	UBN2	AEQPPRPPRETVRLELVLK
195	5.00609e-22	NM_000147	FUCA1	STDPDKGLFISLPQLPPSA
196	4.91794e-22	NM_001804	CDX1	SPVYPGPARPASLGLGPQA
197	4.86078e-22	NM_013285	GNL2	SLLHDRIRPHNLKVHILDT
198	4.8307e-22	NM_004980	KCND3	SLTTSRSSLNLKADDGLRP
199	4.76338e-22	NM_007192	SUPT16H	SRIIHRRRPRTLPLNRESP
200	4.76061e-22	NM_006715	MAN2C1	NTLPWKRIEVMALPKPGGA
201	4.69641e-22	NM_024640	YRDC	SPAPAAPGARLLRLPGSGA
202	4.68792e-22	NM_138433	KLHDC7B	NTVTGSWSRAASLPLPAPA
203	4.67355e-22	NM_203305	FAM102A	PEKPPRPPRPLHLSDRSFR
204	4.56015e-22	NM_152892	LRWD1	SDRLGKIRSLDLSGLELLS
205	4.55052e-22	NM_003203	C2orf3	EESPAEPGAPRELPVPGSA
206	4.53791e-22	NM_002140	HNRNPK	PGRGGRGGSRARNLPLPPP
207	4.53119e-22	NM_178123	SESTD1	GNQQEKERSVDLNFLPSVD
208	4.52837e-22	NM_054027	ANKH	ILATQRISRPIVNLFVSRD
209	4.49817e-22	NM_001830	CLCN4	SPHPLKLRRILNLSPFTVT
210	4.38575e-22	NM_018346	RSAD1	RLFPGRVSVDLMLGLPAQQ
211	4.31144e-22	NM_015099	CAMTA2	VLFEYRARRFLSLPSTQLD
212	4.29675e-22	NM_001836	CMA1	MLLKLKEKASLTLAVGTLP
213	4.25847e-22	NM_012411	PTPN22	DSVILRPSKSVKLRSPKSG
214	4.16818e-22	NM_021221	LY6G5B	SSLPEPHDRPLALPLSDSQ
215	4.15907e-22	NM_144685	HIPK4	APLPARHIRTVTLQVLTAL
216	4.03471e-22	NM_133444	ANF526	HQRVHARARTLTLQPPRSP
217	3.97812e-22	NM_182540	DDX26B	SPMSSKRRRSMSLLLRKPQ
218	3.97574e-22	NM_001080517	SETD5	SSLPSDLRTISLPSAGQSA
219	3.89886e-22	NM_006646	WASF3	PSASARHMALNRPQQPPPP
220	3.81238e-22	NM_002895	RBL1	STGINRPKRTGSLALFYRK
221	3.77329e-22	NM_001897	CSPG4	RPAIQIHRSTGLRLAQGSA
222	3.70958e-22	NM_001076785	SLC7A6	SSPPQRSSETMQLKKEISL
223	3.70424e-22	NM_144666	DNHD1	HLMPHWPKELLQLLLELLG
224	3.66789e-22	NM_002676	PMM1	VTAQAARRRERVLCLFDVD
225	3.65171e-22	NM_005019	PDE1A	FLQGDKEAELGLPFSPLCD
226	3.55311e-22	NM_024602	HECTD3	KIKSSRQRELGLNADLFQP
227	3.53448e-22	NM_031913	ESYT5	VTVPVKKGLDLTNLRFPLP
228	3.37544e-22	NM_024675	PALB2	SEILSQPKSLSLEATSPLS
229	3.36852e-22	NM_017848	FAM120C	APRAARGSVPLQPPLPPAA
230	3.36046e-22	NM_015545	PTCD1	ALQVWRLMLSLGLQPSRDS
231	3.35799e-22	NM_020443	NAV1	SSALSSPRRSLGLALTHSF
232	3.34675e-22	NM_001040462	BTNL8	SIAEGRISLRLENITVLDA
233	3.33381e-22	NM_014761	KIAA0174	VPAPQHLKTLTLMIFPGGL
234	3.25722e-22	NM_005270	GLI2	PRVTPRLSRKRALSISPLS
235	3.22688e-22	NM_012267	HSPBP1	SDEGSRGSRLPLALPPASQ
236	3.17309e-22	NM_001029870	ANKRD56	ALAPHRTSEHKSSLVPLDA
237	3.17098e-22	NM_014630	ANF592	APANLLPKAVHLANLNLVP
238	3.16744e-22	NM_004723	ARHGEF2	VELLLTPREPALPLEPDSG
239	3.13579e-22	NM_004716	PCSK7	SITHPRRGSLELKLFCPSG
240	3.0537e-22	NM_003482	MLL2	ARKTDRPALHLRIPPQPGA
241	3.03635e-22	NM_014876	JOSD1	PWKGDKAKSESLELPQAAP
242	3.01786e-22	NM_001039707	SDCCAG3	PGATPLSRARSLAIPDAPA
243	3.00856e-22	NM_198501	SMTNL2	FSAPDPPRPRPVSLSLRLP
244	2.99894e-22	NM_033626	CCDC120	QLRDVRARLGLPVLPLPQP
245	2.97068e-22	NM_152795	HIF3A	STLTSRGRTLNLKAATWKV
246	2.95385e-22	NM_006526	ZNF217	SPAPDKTKRPETKLKPLPV
247	2.91451e-22	NM_020870	SH3RF1	AEPSGRIVTVLPGLPTSPD
248	2.89828e-22	NM_016442	ERAP1	ASFSIKIRREPRHLAISNM
249	2.87581e-22	NM_030650	KIAA1715	DEFTARLAMTLPFFAFPLI
250	2.80285e-22	NM_198488	FAM83H	PPVPERRGSLTLTISGESP
251	2.78354e-22	NM_033427	CTTNBP2	PQLPPKPSIDLTVAPAGCA
252	2.77479e-22	NM_018192	LEPREL1	GGPPDSPRRELELEPGPLQ
253	2.77334e-22	NM_022719	DGCR14	ILEPGRRERLGLKMANEAA
254	2.69733e-22	NM_001673	ASNS	EEESERLLRELYLFDVLRA
255	2.66837e-22	NM_194255	SLC19A1	ALRMSRPRLGLCLPGPFPP
256	2.66793e-22	NM_005167	PPM1J	VEARASFSRPTFLQLSPGG
257	2.6659e-22	NM_018451	CENPJ	VSEPSRSSSLSLSKMDFDD
258	2.6179e-22	NM_000089	COL1A2	EYKTNKPSRLPFLDIAPLD
259	2.60347e-22	NM_198467	RSBN1L	PIASVRIKEEPVNVNIPEK
260	2.54695e-22	NM_018958	C15orf2	RNRPCKRKMSIPLLLPLPP
261	2.54471e-22	NM_017938	FAM70A	SLTQQRSSDMSLPDSMGAF
262	2.54206e-22	NM_001080519	BAHCC1	IGAEAKRKSLELASLGYSG
263	2.52188e-22	NM_145065	PELI3	SPPLSLPGPHKLPIPLPKP
264	2.51017e-22	NM_014808	FARP2	PSPSSRKSPLSLSPAFQVP
265	2.5045e-22	NM_007343	PRSS3	AVINARVSTISLPTAPPAA
266	2.49716e-22	NM_001079669	TMTC4	SEDGHKRRILTLGLGFLVI
267	2.49671e-22	NM_015503	SH2B1	GPCPATSPRPMTLPLAPGT
268	2.44575e-22	NM_018058	CRTAC1	SSAASRISEPLSRASYLSL
269	2.44208e-22	NM_023068	SIGLEC1	PGRAPRLSRPITLDVLYAP
270	2.4283e-22	NM_003048	SLC9A2	PEKLQKRRTISIADGNSSD
271	2.42642e-22	NM_194312	ESPNL	DTEPGRKSGLTLLGPLPHA
272	2.41586e-22	NM_001042422	SLC16A3	SGPPRPSRRLLDLSVFRDR
273	2.35278e-22	NM_178128	FADS6	DNKPRRIHMMSLGVLNLAR
274	2.30425e-22	NM_006544	EXOC5	DLKERIRQRTNLPLGPSID
275	2.30093e-22	NM_001037335	PRIC285	AQSYQRRARSLHLAVQLKA
276	2.30006e-22	NM_014170	GTPBP8	FLAPYGRQDLHLRIFDPSP
277	2.29806e-22	NM_003737	DCHS1	HNPPGRLAPVTLSLSGGDP
278	2.29685e-22	NM_198679	RAPGEF1	NSFLSRHGSLPVPSEPPAG
279	2.29395e-22	NM_001012968	SPIN4	GLELHRDKRVLALEILPER
280	2.27241e-22	NM_006311	NCOR1	VSSPLKPNPLDLPQLQHRA
281	2.26471e-22	NM_015346	ZFYVE26	SWKELRGRREVPLAAEQVA
282	2.23763e-22	NM_022453	RNF25	PPPEGPLKEPMDLKPEPHS
283	2.22409e-22	NM_024336	IRX3	SLAGAARRDGDLGLGPISD
284	2.21871e-22	NM_001080453	INTS1	DSVLGRRCRDLLLQLYLQR
285	2.19841e-22	NM_030626	LRRC27	TSQEAPPVREMTLRDLPSP
286	2.18773e-22	NM_001127511	APC	IDLLERLKELNLDSSNFPG
287	2.17442e-22	NM_031293	PMFBP1	SSLNSKLLSLQLDIKNLHD
288	2.14047e-22	NM_138447	ZNF689	RPSRKRGRRPRALKFVDVA
289	2.13734e-22	NM_014521	SH3BP4	SLDELNPKSTVDLLLFDAG
290	2.125e-22	NM_006920	SCN1A	SNLSQTSRSSRMLAVFPAN
291	2.11891e-22	NM_020314	C16orf62	DEALKRQSSLGLSFFNSIL
292	2.10785e-22	NM_018325	C9orf72	AEKVNKIVRTLCLFLTPAE
293	2.0994e-22	NM_001465	FYB	FLKPVGPKPINLPKEDSKP
294	2.08871e-22	NM_002056	GFPT1	ISMQERRKEIMLGLKRLPD
295	2.08849e-22	NM_005584	MAB21L1	CLSILKTLRDRHLELPGQP
296	2.08515e-22	NM_020230	PPAN	EEASGIPSRTASLELGEDD
297	2.08117e-22	NM_002583	PAWR	EEMIGKLKEEIDLLNRDLD
298	2.06961e-22	NM_052899	GPRIN1	PLASGKGEPVSLGKADSAP
299	2.06904e-22	NM_022068	FAM38B	SLGHGRRDSSDSLKSINLA
300	2.06671e-22	NM_153246	C6orf223	ESDSAKPASLRLLQHTPSA
301	2.06619e-22	NM_031989	PCBP2	STAASRPPVTLRLVVPASQ
302	2.06196e-22	NM_015080	NRXN2	DPVTFKSRSSYLALATLQA
303	2.05958e-22	NM_005633	SOS1	QSAIEKRKRRNPLSLPVEK
304	2.02318e-22	NM_007204	DDX20	AAGFERPSPVQLKAIPLGR
305	2.01516e-22	NM_002088	GRIK5	ALLSLRAVREMRLSNGKLY
306	1.97478e-22	NM_173054	RELN	FSDFSKPRFVYLELPAAAK
307	1.96969e-22	NM_004260	RECQL4	ALLYSRRSPCLTLVVSPLL
308	1.96659e-22	NM_001024611	LRRC66	GTPQSRISRETRLPPIHLH
309	1.95479e-22	NM_152424	FAM123B	EGEWSRDSPLSLYTEPPGA
310	1.94753e-22	NM_139074	DEFB127	ITKPPRPKPATLALTLQDY
311	1.9437e-22	NM_152759	LRRC43	SLRTLRHLRLLVLQGNPLA
312	1.94134e-22	NM_030582	COL18A1	QRMPLARSSRGLELEPGAG
313	1.92942e-22	NM_032387	WNK4	RPRSSRLSRRSSVDLGLLS
314	1.90418e-22	NM_015074	KIF1B	PEEISRINDLDLKSSTLLD
315	1.89639e-22	NM_005854	RAMP2	RTRVGRPAALRLLLLLGAV
316	1.87648e-22	NM_002770	PRSS2	AVINSRVSAISLPTAPPAA
317	1.87545e-22	NM_006100	ST3GAL6	PGAPLRSSLLGLGGSLLPA
318	1.87333e-22	NM_004321	KIF1A	VLSPLRPSRRHFPRVMPLS
319	1.86783e-22	NM_001098784	FAM89B	AGPAAGPRRPVNLDSALAA
320	1.867e-22	NM_015638	TRPC4AP	ILMLARRKERLPLYLRLLQ
321	1.86501e-22	NM_013356	SLC16A8	SPRVRPRRRLLDLAVCTDR
322	1.85708e-22	NM_017676	GIN1	SGAHHGISRTLTLVESNYY
323	1.85561e-22	NM_007207	DUSP10	VVALSRPVRPQDLNLCLDS
324	1.85261e-22	NM_001003845	SP5	SPDLGKHSPLALLAATCSR
325	1.84396e-22	NM_014722	FAM65B	KPAVSRSRSSSLSLTVESA
326	1.81052e-22	NM_205859	OR2K2	TILDSRLKTPMYLFLGNLS
327	1.80051e-22	NM_078471	MYO18A	SLASQLKSEELNLPEGKVR
328	1.78073e-22	NM_052813	CARD9	GAALMRNRDLQLEVRPLPP
329	1.75027e-22	NM_198255	TERT	PGARRRGGSASRSLPLPKR
330	1.73837e-22	NM_003190	TAPBP	LPASGRSAEVTLEVAGLSG
331	1.72659e-22	NM_032407	PCDHGC5	SPSLHKHLTIRLNISDVND
332	1.72478e-22	NM_007118	TRIO	SSDSNKSSKSLQLDIIPAS
333	1.72039e-22	NM_138328	RHBDL3	SSKLDPHKREVLLALADSH
334	1.70545e-22	NM_001008708	CHAC2	RGVPGKPGRVVTLVEDPAG
335	1.69969e-22	NM_144720	JAKMIP1	RNELLKRSRETEVQLKPLV
336	1.6724e-22	NM_001372	DNAH9	PLLVVRPGPRGLAIRPGLE
337	1.66903e-22	NM_003501	ACOX3	SLSSGRVSIVSLAILNLKL
338	1.62546e-22	NM_001099436	ULK3	SELEEKIRSNRVIELPLRP
339	1.59914e-22	NM_172071	RC3H1	SLLSNKTSSLNLSEDPEGG
340	1.58061e-22	NM_001712	CEACAM1	NPVSANRSDPVTLNVTYGP
341	1.57934e-22	NM_033071	SYNE1	SLSVLRSKCKRNLEIPGKS
342	1.56428e-22	NM_000214	JAG1	PRTRGRSGRPLSLLLALLC
343	1.55862e-22	NM_138346	KIAA2013	REGLLRRVRCLQLGSPGPG
344	1.52406e-22	NM_002821	PTK7	RGSPARPRRLPLLSVLLLP
345	1.50884e-22	NM_020664	DECR2	AGATGRRCLPLSMDVRAPP
346	1.50402e-22	NM_001004416	UMODL1	STTVSRLLLGLPRPLPVAD
347	1.47308e-22	NM_017437	CPSF2	QIVNLKGKGHGLSITPLPA
348	1.45681e-22	NM_002483	CEACAM6	NPASANRSDPVTLNVLYGP
349	1.45221e-22	NM_017434	DUOX1	VLSSNRGRRTLLLKIPKEY
350	1.43351e-22	NM_005477	HCN4	RQDPSRRSIRLRPLPSPSP
351	1.43261e-22	NM_025164	SIK3	SLLCDRHKRHKTLRLGALP
352	1.4249e-22	NM_207363	NCKAP5	SKLPLRIPPKSEGLLIPPG
353	1.42441e-22	NM_016484	PDZD11	NELTQFLPRTITLKKPPGA
354	1.39437e-22	NM_014324	AMACr	VSRLGRGKRSLVLDLKQPR
355	1.39401e-22	NM_152547	BTNL9	VLAPHRVALTLRVPPRRLG
356	1.39043e-22	NM_003469	SCG2	PNGSVEPERELDLPVDLDD
357	1.38352e-22	NM_024052	C17orf39	HPARARPGLSLPATLLGSR
358	1.3493e-22	NM_000594	TNF	PQREEFPRDLSLISPLAQA
359	1.34579e-22	NM_005702	ERAL1	IISPGKQKRHHLELSLLED
360	1.34456e-22	NM_139265	EHD4	SGEKQRISRGQCLSLPLPT	questionable
361	1.33387e-22	NM_024741	ANF408	DILALKSLPRGLALGPSLA
362	1.33048e-22	NM_001080423	GRIP2	RRREHKSSLSLASSTVGPG
363	1.32948e-22	NM_032229	SLITRK6	SEISVPPSRPFQLSLLNNG
364	1.31025e-22	NM_006445	PRPF8	RPFNLRSGRTRRALDIPLV
365	1.30263e-22	NM_001077441	BCLAF1	ASDSHRPEVKLKMAPVPLD
366	1.29537e-22	NM_001466	FZD2	RPRSALPRLLLPLLLLPAA
367	1.27915e-22	NM_017721	CC2D1A	LEALSRGEPVDLSCLPPPP
368	1.27754e-22	NM_020733	HEG1	DPPPSPARRALSLAPLAGA
369	1.26998e-22	NM_152623	CDC20B	VSRSGHRGRVLHLALSPDQ
370	1.25552e-22	NM_130773	CNTNAP5	ELQKGRLALHLNLGDSKAR
371	1.25486e-22	NM_021982	SEC24A	SSKGERRIRVHTLCLPVVS
372	1.24871e-22	NM_001453	FOXC1	SLPSARPLSLDGADSAPPP
373	1.24501e-22	NM_020901	PHRF1	ATTRSRIARTLGLRRPVHS
374	1.23454e-22	NM_018214	LRRC1	SLTALKLKALWLSDNQSQP
375	1.22161e-22	NM_000255	MUT	SIKPLYSKRDTMDLPEELP
376	1.20948e-22	NM_005234	NR2F6	PSQPQRFGRLLLRLPALRA
377	1.19451e-22	NM_152788	ANKS1B	DDPPQKPPRSITLREPSGN
378	1.1882e-22	NM_001243	TNFRSF8	SLLVDSQASKTLPIPTSAP
379	1.18559e-22	NM_031935	HMCN1	SPAGHKSRSFSLNVFVSPT
380	1.18325e-22	NM_178468	FAM83C	SPRALRPPPVALAFRPDVP
381	1.18274e-22	NM_172231	SF4	SLLISRRTGLGLASLPGPV
382	1.1816e-22	NM_033025	SYDE1	VAPYLRPKRQPPLHLPLAD
383	1.14194e-22	NM_032518	COL25A1	HEALQRITTLTVTGPPGPP
384	1.13957e-22	NM_001029880	SFMBT2	EVPSARPRRAVTLRSGSEP
385	1.13423e-22	NM_006393	NEBL	FEKEIKGRSSLDLDKTPEF
386	1.13329e-22	NM_052916	RNF157	FRALLQIRAMRKKLGPLSP
387	1.10248e-22	NM_012088	GLS	SPKPPPQRVTLTLPVLNAA
388	1.09972e-22	NM_014424	HSPB7	FPAPSGPWRGLNLASRQGA
389	1.09261e-22	NM_005224	ARID3A	ITVPGRLPVSLAGHPVVAA
390	1.08913e-22	NM_004836	EIF2AK3	ATLSISPPRPTTLSLDLTK
391	1.08168e-22	NM_133378	TTN	SSPSDPSKFTLAVSPVDPP
392	1.08128e-22	NM_019113	FGF21	DPAPRGPARFLPLPGLPPA
393	1.06598e-22	NM_080875	MIB2	SYTNHRGRSPLDLAAEGRV
394	1.06361e-22	NM_001077686	AGAP8	HSLGTRLSRVRSLELDDWP
395	1.05399e-22	NM_024690	MUC16	PTASTSRKTSLFLGPSMAR
396	1.04612e-22	NM_153334	SCARF2	PTRRPRPRRELSLGRKKAP
397	1.04447e-22	NM_025176	NINL	SGLGALPARRDLTLELEEP
398	1.03934e-22	NM_017951	SMPD4	ASLLGKQQVTLPIPCRAAV	questionable
399	1.03605e-22	NM_014803	ZNF518A	RPRLSKDSIRTLRLFPFSS
400	1.01128e-22	NM_015719	COL5A3	SIYDERGARQLGLALGPAL
401	1.00528e-22	NM_001076786	QSER1	SSESSKPIELDGLPSDQFA
402	1.0034e-22	NM_139315	TAF6	ALQAQQPRPTLTLSQAPQP
403	1.00075e-22	NM_021824	NIF3L1	ATMIDRIKRHLKLSHIRLA

## Sheet: Table 2
Whisenant et al. 2010 Supplementary Table 2. Sequence Conservation in Mouse Orthologs of D-finder Predictions
RefSeq	Gene Name	HMM Score	HMM Rank	UCSC knownGene	Protein Ident	Protein Conserv	D-site Identity	D-site Conserv	Alignment ClustalW2
NM_005456	JIP1	2.43e-14	1	uc001nbr.2	93.8	95.6	100	100	HUMAN SGDTYRPKRPTTLNLFPQV
			1						MOUSE SGDTYRPKRPTTLNLFPQV
			1						ALIGN *******************
NM_015133	JIP3	7.69e-15	2	uc002cmk.2	93.8	95.7	100	100	HUMAN SSLPGRRKERPTSLNVFPL
			2						MOUSE SSLPGRRKERPTSLNVFPL
			2						ALIGN *******************
NM_012324	JIP2	3.33e-17	3	uc003bmx.2	87.3	90	78.9	85.5	HUMAN VEEPHKHRPTTLRLTTLGA
			3						MOUSE LEESHKLRPTTLHLTTLGA
			3						ALIGN :**.** *****:******
NM_000168	GLI3	2.55e-18	4	uc011kbh.1	86.5	90.4	100	100	HUMAN PRLSARPSRKRTLSISPLS
			4						MOUSE PRLSARPSRKRTLSISPLS
			4						ALIGN *******************
NM_145185	MKK7	1.96e-18	5	uc002mit.2	98.8	99.2	100	100	HUMAN DISPQRPRPTLQLPLANDG
			5						MOUSE DISPQRPRPTLQLPLANDG
			5						ALIGN *******************
NM_006856	ATF2	1.78e-18	6	uc001sdz.2	97.5	98.5	100	100	HUMAN HLAVHKHKHEMTLKFGPAR
			6						MOUSE HLAVHKHKHEMTLKFGPAR
			6						ALIGN *******************
NM_001114123	ELK1	1.04e-18	7	uc004dik.3	85.1	89.2	94.7	97.4	HUMAN ISQPQKGRKPRDLELPLSP
			7						MOUSE ITQPQKGRKPRDLELPLSP
			7						ALIGN *:*****************
NM_024608	NEIL1	5.49e-19	8	uc002bad.2	79.5	84.7	89.5	89.5	HUMAN ISASARGKELRLILSPLPG
			8						MOUSE ISALARGKELRLTLSPLPG
			8						ALIGN *** ******** ******
NM_025049	PIF1	3e-19	10	uc002ant.2	84.7	88.8	78.9	85.5	HUMAN FYATLRRGRSLSLESPDDD
			10						MOUSE FYATLRQGRGLSLESQDDE
			10						ALIGN ******:**.***** **:
NM_020888	KIA1522	1.66e-19	11	uc001bvu.1	80.5	84.9	100	100	HUMAN SGKSGRRRRERRSTVLGLP
			11						MOUSE SGKSGRRRRERRSTVLGLP
			11						ALIGN *******************
NM_003010	MKK4	1.54e-19	12	uc002gnj.2	97.7	98.3	94.7	96.1	HUMAN SSMQGKRKALKLNFANPPF
			12						MOUSE SSMQGKRKALKLNFANPPV
			12						ALIGN ******************.
NM_001007561	IRGQ	9.44e-20	13	uc010eiv.2	78	82.3	78.9	85.5	HUMAN PTALARRERALGLASGELA
			13						MOUSE PAAVARRERALGLAPGVLA
			13						ALIGN *:*:**********.* **
NM_173164	NFAT4	6.06e-20	16	uc002evk.2	86.7	89.9	94.7	97.4	HUMAN REFLERPSRDHLYLPLEPS
			16						MOUSE REYLERPSRDHLYLPLEPS
			16						ALIGN **:****************
NM_014727	MLL4	4.27e-20	18	uc010eei.2	89.8	92.2	100	100	HUMAN DEVQLRSTRRATSLELPMA
			18						MOUSE DEVQLRSTRRATSLELPMA
			18						ALIGN *******************
NM_004844	SAB	3.93e-20	19	uc003bzp.1	92.1	93.9	94.7	96.1	HUMAN FPAVVRPGSLDLPSPVSLS
			19						MOUSE FPAVARPGSLDLPSPVSLS
			19						ALIGN ****.**************
NM_001081573	GAB3	3.67e-20	20	uc004fmk.1	76	82.5	89.5	92.1	HUMAN DLKPQRKSRPPPLDLRNLS
			20						MOUSE NLKPQRKSRPPPLDSRNLS
			20						ALIGN :************* ****
NM_004285	H6PD	3.38e-20	21	uc001apt.2	83.1	88.2	84.2	89.5	HUMAN PSQPHRRMSLSLPLINRAK
			21						MOUSE PFRPHQRMSLSLPLINRAK
			21						ALIGN * :**:*************
NM_014935	PLEKHA6	3.36e-20	22	uc001hau.2	90.3	93	89.5	94.7	HUMAN GSMREKRRSLQLPASPAPD
			22						MOUSE GSMKEKRRSLQLPASPAPE
			22						ALIGN ***:**************:
NM_022095	ZF335	3.36e-20	23	uc002xqw.2	86.7	90.4	63.2	76.3	HUMAN SSPPATSKALGLAVPPSPP
			23						MOUSE TPPPAASHTLGLVVPQSPP
			23						ALIGN :.***:*::***.** ***
NM_052966	FAM129A	3.3e-20	24	uc001gra.2	52.5	58.1	31.6	42.1	HUMAN PSSLAKGESLSLPGPSPPP
			24						MOUSE P-----G-SLAISASSCPS
			24						ALIGN * * **::...* *.
NM_018657	MYNN	2.56e-20	25	uc003fft.2	92	94.7	94.7	97.4	HUMAN ETMDVKPSDMTLPLALPLG
			25						MOUSE ETLDVKPSDMTLPLALPLG
			25						ALIGN **:****************
NM_014510	PICLO	2.38e-20	26	uc003uhv.2	79.8	84.2	94.7	97.4	HUMAN ASSSARTKPTSLPISQSRG
			26						MOUSE SSSSARTKPTSLPISQSRG
			26						ALIGN :******************
NM_000045	ARG1	2.28e-20	27	uc003qcp.1	86.7	91.2	100	100	HUMAN SYLLGRKKRPIHLSFDVDG
			27						MOUSE SYLLGRKKRPIHLSFDVDG
			27						ALIGN *******************
NM_015267	CUX2	2.03e-20	28	uc001tsa.1	79.5	83.3	63.2	68.4	HUMAN ASESSRCSLEVSLNSPSAA
			28						MOUSE TSESSCCSLEGPPNSPSVI
			28						ALIGN :**** **** . ****.
NM_181523	PI3KR1	1.78e-20	29	uc003jvb.2	96	97.2	100	100	HUMAN SPPTPKPRPPRPLPVAPGS
			29						MOUSE SPPTPKPRPPRPLPVAPGS
			29						ALIGN *******************
NM_012166	FBOX10	1.5e-20	31	uc004aab.2	93.6	95.7	84.2	92.1	HUMAN FSLFRRRRERRTLSVGPGR
			31						MOUSE FSLFRRKKERRTLSVGPGH
			31						ALIGN ******::**********:
NM_013270	TSP50	1.48e-20	32	uc003cqe.1	54.7	63.2	78.9	82.9	HUMAN ALALPAPSRTLLLALPLPL
			32						MOUSE PLALPAPSRTLLLAFLLLL
			32						ALIGN .*************: * *
NM_012318	LETM1	1.41e-20	34	uc003gdv.2	83.6	87.8	100	100	HUMAN PTSLLILSRAMYLPDTLSP
			34						MOUSE PTSLLILSRAMYLPDTLSP
			34						ALIGN *******************
NM_015446	AHCTF1	1.36e-20	35	uc001ibu.1	69.8	77.9	78.9	89.5	HUMAN SKASQKISRLLDLVVQPVP
			35						MOUSE SNTSQRISRLLDLVVHPVP
			35						ALIGN *::**:*********:***
NM_205855	FAM180A	1.25e-20	36	uc003vtd.2	78.6	84.7	94.7	94.7	HUMAN FPAAHRPKRSSSLPLNPVL
			36						MOUSE FPAAHRPKRSLSLPLNPVL
			36						ALIGN ********** ********
NM_138368	DKFZp761E198	1.21e-20	37	uc001ofo.3	71.8	77.8	73.7	78.9	HUMAN CLCPGRPARPLLLPLQPRC
			37						MOUSE CLRPGQPAHPLYLLLQPRC
			37						ALIGN ** **:**:** * *****
NM_001024593	ZMYND17	1.19e-20	39	uc001jud.2	76.7	82.9	89.5	94.7	HUMAN RLLTDVLSRPLTLGLGLRA
			39						MOUSE RLMTDVLSRPLTLGLGLRT
			39						ALIGN **:***************:
NM_005128	DOPEY2	1.14e-20	40	uc002yvg.2	86.4	90.6	84.2	89.5	HUMAN SSLLGVLKESVQLNLAPPG
			40						MOUSE PSLLGVLKEAAQLNLAPPG
			40						ALIGN .********:.********
NM_138459	NUS1	1.12e-20	41	uc003pxw.2	89.2	91.3	73.7	82.9	HUMAN QLVAQKQKRPTDLDVDTLA
			41						MOUSE QLVAQQQRKPTDLDVDLLG
			41						ALIGN *****:*::******* *.
NM_033394	TANC1	1.06e-20	42	uc002uag.2	89.4	92.5	100	100	HUMAN RVSLAKGVSMSLPSSPLLP
			42						MOUSE RVSLAKGVSMSLPSSPLLP
			42						ALIGN *******************
NM_018490	LGR4	1.04e-20	43	uc001mrj.3	93	95.3	100	100	HUMAN SISPEIMKSVTLIFFPLPA
			43						MOUSE SISPEIMKSVTLIFFPLPA
			43						ALIGN *******************
NM_138477	CDAN1	9.78e-21	44	uc001zql.2	88.2	91.6	78.9	82.9	HUMAN SGSPSRPSLTLSDPPNLSN
			44						MOUSE SGSPGSPRLSLSDPPNLSN
			44						ALIGN ****. * *:*********
NM_001009944	PKD1	8.39e-21	47	uc002cos.1	78.2	84.5	63.2	76.3	HUMAN PSRLARASRGVDLATGPSR
			47						MOUSE PSRLSRASQGLDQTVGPNR
			47						ALIGN ****:***:*:* :.**.*
NM_001105203	RUSC1	8.31e-21	48	uc001fkj.2	83.8	87.7	100	100	HUMAN HELAQKRKRGPGLPLVPQA
			48						MOUSE HELAQKRKRGPGLPLVPQA
			48						ALIGN *******************
NM_138440	VASN	8.15e-21	49	uc002cwj.1	83.2	87.3	73.7	76.3	HUMAN PVTPRPPRSLTLGIEPVSP
			49						MOUSE PDTPRPPPLLPLSIEPVSP
			49						ALIGN * ***** *.*.******
NM_019619	PARD3	7.89e-21	50	uc010qeq.1	82.9	85.5	52.9	53.7	HUMAN FVKTRKSKSMDLG---------------SSPSRD
			50						MOUSE FVKTRKSKSMDLGIADETKLNTVDDQRAGSPSRD
			50						ALIGN ************* .*****
NM_002286	LAG3	7.67e-21	52	uc001qqt.3	68.8	75.1	68.4	71.1	HUMAN SSWGPRPRRYTVLSVGPGG
			52						MOUSE SPRQPAPGRYTVLSVAPGG
			52						ALIGN *. * * *******.***
NM_080686	BAT2	7.51e-21	53	uc011hrz.1	89.8	92.8	94.7	94.7	HUMAN SLHPYRSQPLYLPPGPAPP
			53						MOUSE SLHQYRSQPLYLPPGPAPP
			53						ALIGN *** ***************
NM_015493	KANK2	6.32e-21	56	uc002mqm.2	81.9	86.3	68.4	77.6	HUMAN HPTAGRGRSELCLDLPDPP
			56						MOUSE HPSGTRSRSELCLDLPEAP
			56						ALIGN **:. *.*********:.*
NM_004238	TRIP12	5.19e-21	58	uc002vpw.1	96.6	97.2	100	100	HUMAN SPSLQHSRDDSLDLSPQGR
			58						MOUSE SPSLQHSRDDSLDLSPQGR
			58						ALIGN *******************
NM_005027	PIK3R2	4.91e-21	60	uc002nia.1	89.3	92.3	94.7	97.4	HUMAN ALYPFRRERPEDLELLPGD
			60						MOUSE AVYPFRRERPEDLELLPGD
			60						ALIGN *:*****************
NM_152629	GLIS3	4.54e-21	61	uc003zhw.1	71.2	74.6	89.5	94.7	HUMAN RSHSARSKKRALSLSPLSD
			61						MOUSE RAHSTRSKKRALSLSPLSD
			61						ALIGN *:**:**************
NM_001369	DNAH5	4.5e-21	62	uc003jfd.2	89.5	93.1	63.2	67.1	HUMAN RLELWLRSRPTGTLELPPP
			62						MOUSE RMELWLRSREGPTLHLPQL
			62						ALIGN *:******* **.**
NM_001080397	SLC45A1	4.47e-21	63	uc001apb.2	90.4	93	84.2	90.8	HUMAN PRSSGILKRPQTLAIPDAA
			63						MOUSE PRASGILKRPQTLALPDVA
			63						ALIGN **:***********:**.*
NM_032789	PARP10	3.78e-21	64	uc003zal.3	62.8	69.8	78.9	81.6	HUMAN ALASPRPDRALVQLPKPLS
			64						MOUSE ALASPRQDCALVQLSTPLS
			64						ALIGN ****** * *****..***
NM_001103175	CCDC64B	3.4e-21	66	uc002ctf.3	84.1	88.9	89.5	93.4	HUMAN ELLLLRRERREHSLELERA
			66						MOUSE ELLLLRRERKEHKLELERA
			66						ALIGN *********:**.******
NM_032349	NUDT16L1	3.39e-21	67	uc002cxf.1	56.7	57.6	89.5	89.5	HUMAN VEISAVHSRDHGLEVGPPP
			67						MOUSE VEISAVHSRDHGLEVGLLP
			67						ALIGN **************** *
NM_025135	FHOD3	3.39e-21	68	uc002kzs.1	90.1	92.9	84.2	89.5	HUMAN SRSVSRGRADLSLDLTSPA
			68						MOUSE SQSVSRGRADLSLDLSLPA
			68						ALIGN *:*************: **
NM_015254	KIF13B	3.35e-21	69	uc003xhh.3	87.5	90.7	60	68.8	HUMAN ATGPVRRRSTGLR-LGAPEA
			69						MOUSE AVGTGRRRSSGLQPQGAPEV
			69						ALIGN *.*. ****:**: ****.
NM_019858	GPR162	3.32e-21	70	uc001qqw.1	95.9	97	89.5	92.1	HUMAN ASPGHSPRRPRPLGLSPRR
			70						MOUSE ASPGPSPRRPRPLGFSPRR
			70						ALIGN **** *********:****
NM_002714	PPP1R10	3.3e-21	71	uc011gte.1	88.6	90.1	94.7	97.4	HUMAN APSHAKFRSTGLELETPSL
			71						MOUSE APSHAKFRSTGLELDTPSL
			71						ALIGN **************:****
NM_178449	PTH2	3.05e-21	72	uc002pnn.1	79	84.8	68.4	75	HUMAN DPATPRPRRSLALADDAAF
			72						MOUSE GLGSPLSRRSLALADDAAF
			72						ALIGN . .:* .************
NM_021120	DLG3	3.03e-21	73	uc004dyi.1	99.3	99.6	94.7	97.4	HUMAN YLKVAKPGSLHLNDMYAPP
			73						MOUSE YLKVAKPGSIHLNDMYAPP
			73						ALIGN *********:*********
NM_212557	AMTN	2.95e-21	74	uc010ihy.1	58.9	70.2	52.4	64.3	HUMAN RSLP--LKPALGLPPTKLAPD
			74						MOUSE QSLPKQLNPASGVPATKPTPG
			74						ALIGN :*** *:** *:*.** :*.
NM_003791	MBTPS1	2.94e-21	75	uc002fhi.2	95.8	97.3	94.7	97.4	HUMAN SSRPLRRASLSLGSGFWHA
			75						MOUSE SSRPLKRASLSLGSGFWHA
			75						ALIGN *****:*************
NM_004414	RCAN1	2.85e-21	76	uc002yue.2	92.1	93.7	68.4	73.7	HUMAN AEARARPGVTLRPFAPLSG
			76						MOUSE VEARAPRRVTLRPFAPFSA
			76						ALIGN .**** ********:*.
NM_133644	GTPBP3	2.82e-21	77	uc010eas.2	81.1	86.2	57.9	65.8	HUMAN DLPLARHASLRLLSDPRSG
			77						MOUSE EPPPARRACLRLLRHPCSG
			77						ALIGN : * **:*.**** .* **
NM_022365	DNAJC1	2.71e-21	78	uc001irc.2	84.5	88.4	36.8	44.7	HUMAN AQLPGRRQLGLVPFPPPPP
			78						MOUSE ARLPQRRRSGLESSSVRPL
			78						ALIGN *:** **: ** . .
NM_024742	ARMC5	2.69e-21	79	uc002ecc.2	86.2	90	84.2	89.5	HUMAN PTPPVRLRKTLDLALSILA
			79						MOUSE PSLPMRLRKTLDLALSILA
			79						ALIGN *: *:**************
NM_013261	PPARGC1A	2.63e-21	80	uc003gqs.2	94.4	96.1	94.7	94.7	HUMAN QHLQAKPTTLSLPLTPESP
			80						MOUSE QHAQAKPTTLSLPLTPESP
			80						ALIGN ** ****************
NM_016155	MMP17	2.52e-21	81	uc001ujc.1	81.7	84.8	89.5	89.5	HUMAN APAPAPRAEDLSLGVEWLS
			81						MOUSE --APAPRAEDLSLGVEWLS
			81						ALIGN *****************
NM_002228	c-JUN	2.51e-21	82	uc001cze.2	96.4	97.2	100	100	HUMAN NPKILKQSMTLNLADPVGS
			82						MOUSE NPKILKQSMTLNLADPVGS
			82						ALIGN *******************
NM_018028	SAMD4B	2.32e-21	84	uc002olb.2	96.7	97.3	94.7	96.1	HUMAN HPSPLKRSMSLIPTSPQVP
			84						MOUSE HPSPLKRSMSLIPTSPQAP
			84						ALIGN *****************.*
NM_003635	NDST2	2.27e-21	85	uc001jvk.2	96.7	97.7	100	100	HUMAN VSTSPKAKEPLPLPLGDCS
			85						MOUSE VSTSPKAKEPLPLPLGDCS
			85						ALIGN *******************
NM_001025595	ARFIP1	2.22e-21	86	uc003imz.2	92.5	94.9	100	100	HUMAN SEKLGRGSRTVDLELEAQI
			86						MOUSE SEKLGRGSRTVDLELEAQI
			86						ALIGN *******************
NM_032753	RAX2	2.21e-21	87	uc002lyr.2	38.8	44.1	48.1	53.7	HUMAN AL-PFAR-------PPAMSLPLEPWLG
			87						MOUSE ALAPLGTGPGSGSGPPGSALPLEPWLG
			87						ALIGN ** *:. **. :********
NM_181453	GCC2	2.16e-21	88	uc002tec.2	77.6	84.6	78.9	82.9	HUMAN SLKNLRERRNTDLPLLDMH
			88						MOUSE PSKSLRERRTTDLPLLDMH
			88						ALIGN . *.*****.*********
NM_012278	ITGB1BP2	2.14e-21	89	uc004dzr.1	92.3	93.9	78.9	81.6	HUMAN TLRRERPKSELPLKLLPLN
			89						MOUSE TLFRERPKSEMPPKLLPLL
			89						ALIGN ** *******:* *****
NM_012213	MLYCD	2.14e-21	90	uc002fgz.2	88	91.2	89.5	89.5	HUMAN PGLTARRLLPLRLPPRPPG
			90						MOUSE PGLRARRLLPLRSPPRPPG
			90						ALIGN *** ******** ******
NM_006699	MAN1A2	2.09e-21	92	uc001ehd.1	94.5	96.3	100	100	HUMAN ALLPLSGRRIPPLNLGPPS
			92						MOUSE ALLPLSGRRIPPLNLGPPS
			92						ALIGN *******************
NM_207362	C2orf55	2.06e-21	93	uc002szf.1	52	58	89.5	92.1	HUMAN NPFPVKLRSTSLSLKYRDG
			93						MOUSE SPFPVKLRSTSLSLKYRDS
			93						ALIGN .*****************.
NM_022455	NSD1	2.03e-21	94	uc003mfq.2	88.8	91.8	84.2	86.8	HUMAN STPESRHGAVKSPFLPLAP
			94						MOUSE SMPESRHGAVERPFLPLAP
			94						ALIGN * ********: *******
NM_013247	HTRA2	1.95e-21	97	uc002smi.1	84.5	87.8	94.7	96.1	HUMAN VSSAQRPARDLGLPQTNVE
			97						MOUSE VSSAQRPARDLGLPQNNVE
			97						ALIGN ***************.***
NM_015678	NBEA	1.91e-21	98	uc010abi.2	88.9	89.8	100	100	HUMAN EPHPPRSSAMHLCFLPQSP
			98						MOUSE EPHPPRSSAMHLCFLPQSP
			98						ALIGN *******************
NM_001042410	ANKZF1	1.87e-21	99	uc002vki.2	75.8	81.3	63.2	68.4	HUMAN APSPADPRVLSLLSAPLGS
			99						MOUSE ATGLVDPGVKSLLNAPLGS
			99						ALIGN *.. .** * ***.*****
NM_001172	ARG2	1.81e-21	100	uc001xjs.2	84.7	89.5	94.7	94.7	HUMAN DLLIGKRQRPIHLSFDIDA
			100						MOUSE DRLIGKRQRPIHLSFDIDA
			100						ALIGN * *****************
NM_001001524	TM6SF2	1.77e-21	101	uc002nmd.1	78.6	85.4	68.4	78.9	HUMAN PPLAGKIAALSLSALPVSY
			101						MOUSE PPLAGRTVAMSFCALPVSY
			101						ALIGN *****: .*:*:.******
NM_138425	C12orf57	1.73e-21	102	uc001qrz.2	97.6	98.6	100	100	HUMAN ASLSGKLKALFLPPMTLPP
			102						MOUSE ASLSGKLKALFLPPMTLPP
			102						ALIGN *******************
NM_001014809	CRMP1	1.63e-21	103	uc003gis.2	96.5	97.9	89.5	92.1	HUMAN RPPTLRIRRPAPRDLPLGR
			103						MOUSE RPPALRIRCPAPRDLPLGR
			103						ALIGN ***:**** **********
NM_020144	PAPOLB	1.61e-21	105	uc003snk.2	85	88.9	100	100	HUMAN NPVLLKEPEERNLNLPVWD
			105						MOUSE NPVLLKEPEERNLNLPVWD
			105						ALIGN *******************
NM_172312	SPAG8	1.5e-21	107	uc003zye.2	47.3	53	73.7	76.3	HUMAN STEGSRSRSRSLDIQPSSE
			107						MOUSE STEG--SLSRSCDVQPSSE
			107						ALIGN **** * *** *:*****
NM_004145	MYO9B	1.5e-21	108	uc002nfj.1	81.5	85.4	68.4	76.3	HUMAN SPRPGQLERPTSLALDSRV
			108						MOUSE SPSP--VQRPTTLALDSRV
			108						ALIGN ** * ::***:*******
NM_173540	FUT11	1.41e-21	109	uc001jva.2	86.6	90.1	100	100	HUMAN DYMTEKLWRPMHLGAVPVY
			109						MOUSE DYMTEKLWRPMHLGAVPVY
			109						ALIGN *******************
NM_018557	LRP1B	1.39e-21	110	uc002tvj.1	91.7	94.6	89.5	94.7	HUMAN ILVSKRLKFPRDLSLDPQA
			110						MOUSE VLVSKRLKFPRDLSLDPRA
			110						ALIGN :****************:*
NM_017671	FERMT1	1.34e-21	111	uc002wmr.2	87.9	91.6	84.2	89.5	HUMAN KILNIRRSEELSLLKPSGD
			111						MOUSE KVLNIRRPEELSLLKPSSD
			111						ALIGN *:*****.*********.*
NM_030958	SLCO5A1	1.33e-21	112	uc003xyl.2	88	90.8	100	100	HUMAN SYFGGRGRRPLWLAVGGLL
			112						MOUSE SYFGGRGRRPLWLAVGGLL
			112						ALIGN *******************
NM_012402	ARFIP2	1.31e-21	113	uc001mdk.2	98.8	99.2	100	100	HUMAN SERFGRGSRTVDLELELQI
			113						MOUSE SERFGRGSRTVDLELELQI
			113						ALIGN *******************
NM_024345	DCAF10	1.3e-21	114	uc004aao.2	88.2	90.4	52.6	64.5	HUMAN SLSPAPRSGELGLPGAPES
			114						MOUSE AVSPAERAGEFAAPGALEL
			114						ALIGN ::*** *:**:. *** *
NM_001109760	C17orf70	1.27e-21	116	uc002kao.1	46.6	52.7	84.2	90.8	HUMAN VDQLGPGARREVTLPLGPG
			116						MOUSE VDRLGPGSRREVTLPLGPS
			116						ALIGN **:****:**********.
NM_015440	MTHFD1L	1.23e-21	117	uc003qob.2	88.3	91.3	100	100	HUMAN REQQHRRWRLHCLKLQPLS
			117						MOUSE REQQHRRWRLHCLKLQPLS
			117						ALIGN *******************
NM_022904	RASAL3	1.22e-21	119	uc002nbe.2	78.5	83.2	78.9	82.9	HUMAN ALPPARRLSLRLRGLGPGS
			119						MOUSE ALPPARRLSLRLRSAGPAG
			119						ALIGN *************. **..
NM_006285	TESK1	1.18e-21	120	uc003zxa.2	91.8	93.7	100	100	HUMAN DPRLSRSRSDLFLPPSPES
			120						MOUSE DPRLSRSRSDLFLPPSPES
			120						ALIGN *******************
NM_001029875	RGS7BP	1.17e-21	121	uc003jtj.2	94.6	96.5	100	100	HUMAN KNLLSKLRETMPLPLKNQD
			121						MOUSE KNLLSKLRETMPLPLKNQD
			121						ALIGN *******************
NM_018183	SBNO1	1.17e-21	122	uc010tao.1	97.5	98.3	100	100	HUMAN RAKNQRRRVHMTLELPWSA
			122						MOUSE RAKNQRRRVHMTLELPWSA
			122						ALIGN *******************
NM_001099856	IKBKG	1.16e-21	123	uc011mzr.1	75.8	79.3	89.5	93.4	HUMAN ESPLGKPAMLHLPSEQGAP
			123						MOUSE ESSLGKPAMLHLPSEQGTP
			123						ALIGN **.**************:*
NM_020946	DENND1A	1.14e-21	124	uc004bnz.1	88.5	91.6	100	100	HUMAN PPAVAPSRIRTLPLARSSA
			124						MOUSE PPAVAPSRIRTLPLARSSA
			124						ALIGN *******************
NM_014806	RUSC2	1.1e-21	126	uc003zww.2	86.3	90.1	100	100	HUMAN VLRYSKEQRPTTLPIQPFV
			126						MOUSE VLRYSKEQRPTTLPIQPFV
			126						ALIGN *******************
NM_173691	C9ORF75	1.1e-21	127	uc004clu.2	53.4	57.4	52.6	59.2	HUMAN PPPEGRQSVELPKGDLGPA
			127						MOUSE YPLAGRQ-FEEPKGEVGWA
			127						ALIGN * *** .* ***::* *
NM_001048200	HIPK3	1.09e-21	128	uc009yjv.1	90.5	93.5	100	100	HUMAN ATALKKLKSLGLIHADLKP
			128						MOUSE ATALKKLKSLGLIHADLKP
			128						ALIGN *******************
NM_015114	ANKLE2	1.09e-21	129	uc001ukx.2	68.5	76	63.2	73.7	HUMAN DYFPSPSKTSLPLSPVKTA
			129						MOUSE DYLPSPNKTTPLLSPVKAV
			129						ALIGN **:***.**: *****:.
NM_000094	COL7A1	1.09e-21	130	uc003ctz.2	83.9	88.2	89.5	90.8	HUMAN AEATRRVLERLVLALGPLG
			130						MOUSE AEAVRRVLERLVSALGPLG
			130						ALIGN ***.******** ******
NM_030764	FCRL2	1.09e-21	131	uc010phz.1	41.9	53.5	36.8	51.3	HUMAN RIPVSRPVLTLRSPGAQAA
			131						MOUSE KIPVLNPLLSISVPGVLPF
			131						ALIGN :*** .*:*:: **. .
NM_003502	AXIN1	1.07e-21	132	uc002cgp.1	86.5	90.2	100	100	HUMAN STATPRRSDLDLGYEPEGS
			132						MOUSE STATPRRSDLDLGYEPEGS
			132						ALIGN *******************
NM_007286	SYNPO	1.06e-21	133	uc003lsp.2	81.9	85.9	89.5	93.4	HUMAN AASPAKPSSLDLVPNLPKG
			133						MOUSE AASPAKPSSLDLVPNLPRA
			133						ALIGN *****************:.
NM_006547	IGF2BP3	1.06e-21	134	uc003swg.2	96.4	97.5	100	100	HUMAN PGSVSKQKPCDLPLRLLVP
			134						MOUSE PGSVSKQKPCDLPLRLLVP
			134						ALIGN *******************
NM_004761	RGL2	1.06e-21	135	uc011idc.1	89.8	92.6	89.5	93.4	HUMAN PQAPDLPKPLALPGDPPAD
			135						MOUSE PRAPDLPKPLALPGDSPAD
			135						ALIGN *:*************.***
NM_022490	POLRE1	1.05e-21	136	uc003zzy.1	74.2	81.6	73.7	81.6	HUMAN SEEDHKLGTLSLPLPPAQT
			136						MOUSE REESHRLGTLSVPLPPAQN
			136						ALIGN **.*:*****:******.
NM_020236	MRPL1	1.05e-21	137	uc003hku.2	76.5	82.4	94.7	97.4	HUMAN INEVCRHRPLNLGPFVVRA
			137						MOUSE INEVCKHRPLNLGPFVVRA
			137						ALIGN *****:*************
NM_001129831	CACNA1C	1.02e-21	138	uc001qks.2	92.8	94.3	80	81.3	HUMAN G-SSAARRVRPVSLMVPSQA
			138						MOUSE GSSSMARRARPVSLTVPSQA
			138						ALIGN * ** ***.***** *****
NM_020528	PCBP3	9.76e-22	139	uc002zhr.1	97.3	98.2	100	100	HUMAN SPATSKPPVTLRLVVPASQ
			139						MOUSE SPATSKPPVTLRLVVPASQ
			139						ALIGN *******************
NM_172020	POM121	9.57e-22	140	uc003twk.2	61.7	69.4	89.5	94.7	HUMAN QLLPSRRGEQLTLPPPPQL
			140						MOUSE QLLPSRRGDQLTLPPPPEL
			140						ALIGN ********:********:*
NM_144781	PDCD2	9.15e-22	141	uc003qyb.1	27.1	30.1	28.6	41.7	HUMAN AWP--PGRLPPLHLPLLLPRA
			141						MOUSE VYAPLPGRDDAFHRSLFLFCC
			141						ALIGN .:. *** .:* .*:* .
NM_018067	MAP7D1	8.86e-22	142	uc001bzz.2	86.1	89.8	100	100	HUMAN LSFLARSRSAVTLPRNGRD
			142						MOUSE LSFLARSRSAVTLPRNGRD
			142						ALIGN *******************
NM_022041	GAN	8.63e-22	143	uc002fgo.2	98.3	99	100	100	HUMAN ELSPQKLKEVISLEKLNVG
			143						MOUSE ELSPQKLKEVISLEKLNVG
			143						ALIGN *******************
NM_020856	TSHZ3	8.62e-22	144	uc002nsy.3	95.1	96.8	89.5	93.4	HUMAN IPATRKKASLELELPSSPD
			144						MOUSE IPAARKKPSLELELPSSPD
			144						ALIGN ***:***.***********
NM_006314	CNKSR1	8.57e-22	145	uc001blm.3	75.5	80.8	63.2	64.5	HUMAN VLDSPHQRSPSLSLAPLSP
			145						MOUSE -LDSPHLLSQSLPLNPPSP
			145						ALIGN ***** * **.* * **
NM_022151	MOAP1	8.52e-22	146	uc001ybj.2	76.8	83.5	73.7	82.9	HUMAN AGAVHKTIRRELNLPEDGP
			146						MOUSE AGAVHKSVRRELGLPEGSP
			146						ALIGN ******::****.***..*
NM_181718	ASPHD1	8.37e-22	147	uc002dut.2	82.4	84.5	89.5	94.7	HUMAN VLGIQRPGLLFLPDLPSAP
			147						MOUSE VMGIQRPGLLFLPDLPSSP
			147						ALIGN *:***************:*
NM_001080429	KIAA1543	8.29e-22	148	uc002mgu.3	88	90.7	84.2	92.1	HUMAN SPRSPKHTRPAELRLAPLT
			148						MOUSE TPRSPKHARPAELKLAPLT
			148						ALIGN :******:*****:*****
NM_005932	MIPEP	8.17e-22	149	uc001uox.3	64	68.1	89.5	94.7	HUMAN HLDKEKRKRAVDLNVKILD
			149						MOUSE HLDEEKRRRAVDLNVKILD
			149						ALIGN ***:***:***********
NM_006461	SPAG5	8.09e-22	150	uc002hbq.2	65	74	73.7	85.5	HUMAN MLENLRQSLSLPSMLRDAA
			150						MOUSE MLQNLRQSLSFSSVLQDAA
			150						ALIGN **:*******:.*:*:***
NM_015608	C10orf137	7.91e-22	151	uc001liq.1	93.1	95.4	100	100	HUMAN RTAFARLEEKTDLKLPPAN
			151						MOUSE RTAFARLEEKTDLKLPPAN
			151						ALIGN *******************
NM_002891	RASGRF1	7.84e-22	152	uc002bep.2	84.1	89	89.5	89.5	HUMAN ITKTSSPSRRRKLSLNIPI
			152						MOUSE IG-TSSPSRRRKLSLNIPI
			152						ALIGN * ****************
NM_002229	JUNB	7.78e-22	153	uc002mvc.2	79.3	82.1	84.2	90.8	HUMAN DYKLLKPSLAVNLADPYRS
			153						MOUSE DYKLLKPTLALNLADPYRG
			153						ALIGN *******:**:*******.
NM_004717	DGKI	7.42e-22	155	uc003vtt.2	91.2	92.6	94.7	94.7	HUMAN ANMVQKSKRRTSMPLLNDP
			155						MOUSE ANMVQKSKRRTSMPLLNDI
			155						ALIGN ******************
NM_001105562	UBE4B	7.42e-22	157	uc001aqs.3	87.7	88.5	21.1	21.1	HUMAN PSATSRRPSSLRISPSLGA
			157						MOUSE ---------------SLGA
			157						ALIGN ****
NM_153449	SLC2A14	7.33e-22	158	uc001qtk.2	77.3	82.6	26.3	36.8	HUMAN VSLTSRMKPHTLAVTPALI
			158						MOUSE ---TTK-------VTPSLV
			158						ALIGN *:: ***:*:
NM_016436	PHF20	7.23e-22	159	uc002xek.1	88.6	92.1	73.7	73.7	HUMAN NGAVEKPRPLALPLPRSVE
			159						MOUSE NGAVEKPS----PLPRSVE
			159						ALIGN ******* *******
NM_006439	MAB21L2	7.22e-22	161	uc003ilw.2	99.7	99.9	100	100	HUMAN CLSVLKTLRDRHLELPGQP
			161						MOUSE CLSVLKTLRDRHLELPGQP
			161						ALIGN *******************
NM_138471	C11orf84	7.14e-22	162	uc001nxt.2	81.9	86.8	89.5	90.8	HUMAN PSLPKRSRPRGLRPLELPA
			162						MOUSE PSLPKRLRPRGLRPLELPV
			162						ALIGN ****** ***********.
NM_003573	LTBP4	6.97e-22	164	uc002oog.1	83.7	86.9	80	81.2	HUMAN SPSPS-VRKRQVSLNWQPLT
			164						MOUSE SPSRSPVEKSQVSLNWQPLT
			164						ALIGN *** * *. ***********
NM_005144	HR	6.93e-22	165	uc003xas.2	79.6	84.9	84.2	88.2	HUMAN AGPGLRKGLGLPLSPVRPR
			165						MOUSE AGSGLRKGLSLPLSPVRTR
			165						ALIGN **.******.*******.*
NM_024098	CCDC86	6.9e-22	166	uc001nqa.2	58.5	63.6	52.6	59.2	HUMAN AASPQRQQDLHLESPQRQP
			166						MOUSE PGSPGPRQDADDGSPQRQP
			166						ALIGN ..** :** . ******
NM_015342	PPWD1	6.75e-22	167	uc003jtv.3	96.4	97.5	100	100	HUMAN FHSTLRHDRPYTLSMANAG
			167						MOUSE FHSTLRHDRPYTLSMANAG
			167						ALIGN *******************
NM_006342	TACC3	6.65e-22	168	uc003gdp.2	50.2	56.6	84.2	89.5	HUMAN ESALRKQSLYLKFDPLLRD
			168						MOUSE ESAWRKQSLYVKFDPLLKD
			168						ALIGN *** ******:******:*
NM_014807	C2CD2L	6.63e-22	169	uc001pvo.2	90.9	94	100	100	HUMAN ALDLGPQSRELTLKVLRSS
			169						MOUSE ALDLGPQSRELTLKVLRSS
			169						ALIGN *******************
NM_182684	UPK3B	6.62e-22	170	uc003ufo.2	78.6	83.3	52.6	61.8	HUMAN ALNCLRPSLSLELVPYTPQ
			170						MOUSE VLVWLPQSLSLDLIAYVPQ
			170						ALIGN .* * ****:*:.*.**
NM_003086	SNAPC4	6.58e-22	172	uc004chh.2	58	65.5	26.3	30.3	HUMAN PSGTQEPRGPLGLEKLPLR
			172						MOUSE PQG-QE---------IP--
			172						ALIGN *.* ** :*
NM_020400	LPAR5	6.56e-22	173	uc001qps.2	77.6	82.2	94.7	97.4	HUMAN ATQSQRRRKTVRLLLANLV
			173						MOUSE ATQSQRRRKTVRLLLANLI
			173						ALIGN ******************:
NM_004904	CREB5	6.46e-22	174	uc003szr.2	44.3	45.8	100	100	HUMAN HLMIHRHKHEMTLKFPSIK
			174						MOUSE HLMIHRHKHEMTLKFPSIK
			174						ALIGN *******************
NM_015902	UBR5	6.42e-22	175	uc003ykr.1	98.2	98.9	100	100	HUMAN RSSLSRLGSSRVLLLPLER
			175						MOUSE RSSLSRLGSSRVLLLPLER
			175						ALIGN *******************
NM_012341	GTPBP4	6.29e-22	176	uc001ift.2	94.8	96.7	84.2	88.2	HUMAN ETEESRKKRERDLELEMGD
			176						MOUSE EIEEPKKKRERDLELEMGD
			176						ALIGN * **.:*************
NM_018979	WNK1	6.28e-22	177	uc001qio.3	85.1	89.1	100	100	HUMAN HEKTSRPKLRILNVSNKGD
			177						MOUSE HEKTSRPKLRILNVSNKGD
			177						ALIGN *******************
NM_004864	GDF15	6.08e-22	178	uc002niv.2	57.9	68	63.2	72.4	HUMAN SWDVTRPLRRQLSLARPQA
			178						MOUSE PWDITRPLKRALSLQGPRA
			178						ALIGN .**:****:* *** *:*
NM_024101	MLPH	5.96e-22	179	uc002vwt.2	63.8	72.5	89.5	93.4	HUMAN VKPSGKPRRKSNLPIFLPR
			179						MOUSE VKPSGKPRRKSGIPIFLPR
			179						ALIGN ***********.:******
NM_006017	PROM1	5.86e-22	180	uc003goo.2	60.8	73.5	45	61.3	HUMAN SSELESLKVNLN-IFLLGAA
			180						MOUSE NTELENLNVNIDSIELLDNT
			180						ALIGN .:***.*:**:: * **. :
NM_005056	KDM5A	5.75e-22	181	uc010sdn.1	93	94.2	94.7	97.4	HUMAN KELIEKEKEKDLDLEPLSD
			181						MOUSE KEIIEKEKEKDLDLEPLSD
			181						ALIGN **:****************
NM_001988	EVPL	5.67e-22	182	uc002jqi.2	82.8	88.6	89.5	92.1	HUMAN DEEVGRRRQLELEVQQLRA
			182						MOUSE DEEVGRRRQLELEVRQLGA
			182						ALIGN **************:** *
NM_021147	CCNO	5.58e-22	183	uc003jpw.2	80.1	86	52.6	67.1	HUMAN ADRMLRVSRPVDLRLGDHP
			183						MOUSE ADGLLQHQHEMDLRLGEHP
			183						ALIGN ** :*: .: :*****:**
NM_175709	CBX7	5.57e-22	184	uc003axb.2	88.4	92	78.9	84.2	HUMAN NLESHSHRRELFLQEPPAP
			184						MOUSE HLESHSHRRELSLQESAAP
			184						ALIGN :********** ***..**
NM_014225	PPP2R1A	5.56e-22	185	uc010epm.1	59.5	59.6	26.3	26.3	HUMAN AGSGGRGRRPISLRLNSIK
			185						MOUSE --------------LNSIK
			185						ALIGN *****
NM_024953	C12orf30	5.52e-22	186	uc001ttm.2	92.9	95.5	94.7	97.4	HUMAN ETLWLRIRSLTLRLISGLP
			186						MOUSE ETMWLRIRSLTLRLISGLP
			186						ALIGN **:****************
NM_014963	SBNO2	5.51e-22	187	uc002lrk.3	81.6	86.4	100	100	HUMAN RVQNQRRRVHMTLELPWSA
			187						MOUSE RVQNQRRRVHMTLELPWSA
			187						ALIGN *******************
NM_033130	SIGLEC10	5.5e-22	188	uc002pwo.2	59.8	69.4	63.2	67.1	HUMAN SSHPWGPRPLGLELPGVKA
			188						MOUSE WSSPVGSRTLALELPWVKA
			188						ALIGN * * *.*.*.**** ***
NM_001010903	C6orf222	5.42e-22	190	uc003oly.2	45.6	55.1	63.2	71.1	HUMAN SPEARRPKRPSFLPLCVGG
			190						MOUSE SLEARPPKKHGFLPMCVSG
			190						ALIGN * *** **: .***:**.*
NM_022836	DCLRE1B	5.39e-22	191	uc001eeg.2	75.6	81.9	57.9	69.7	HUMAN EFISQKTREEIGLGSPLVP
			191						MOUSE EFLFPETREKIGLESPLLS
			191						ALIGN **: :***:*** ***:.
NM_173075	APBB2	5.31e-22	192	uc003gvl.2	94.2	95.8	94.7	94.7	HUMAN EGATLRYASLKLRNAPHPD
			192						MOUSE EGATLRYASLKLRNAPHGD
			192						ALIGN ***************** *
NM_018968	SNTG2	5.16e-22	193	uc002qwq.2	82.7	88.1	73.7	78.9	HUMAN GSHQGRNRRTVTLRRQPVG
			193						MOUSE GAPPGANHRTVTLRRQPVG
			193						ALIGN *: * *:***********
NM_173569	UBN2	5.08e-22	194	uc011kqr.1	90.6	93.1	89.5	92.1	HUMAN AEQPPRPPRETVRLELVLK
			194						MOUSE AEPPPRPPKETVRLELVLK
			194						ALIGN ** *****:**********
NM_000147	FUCA1	5.01e-22	195	uc001bie.2	81.1	86.5	57.9	72.4	HUMAN STDPDKGLFISLPQLPPSA
			195						MOUSE TQDPLEGVLISLPQLPPTV
			195						ALIGN : ** :*::********:.
NM_001804	CDX1	4.92e-22	196	uc003lrq.2	84.3	88.5	78.9	84.2	HUMAN SPVYPGPARPASLGLGPQA
			196						MOUSE SPVYQGPARPSSLGLGPPT
			196						ALIGN **** *****:****** :
NM_013285	GNL2	4.86e-22	197	uc001cbk.2	86.1	89.7	89.5	92.1	HUMAN SLLHDRIRPHNLKVHILDT
			197						MOUSE SLLHDRIQPHNAKVHILDT
			197						ALIGN *******:*** *******
NM_004980	KCND3	4.83e-22	198	uc001ebu.1	99.4	99.7	100	100	HUMAN SLTTSRSSLNLKADDGLRP
			198						MOUSE SLTTSRSSLNLKADDGLRP
			198						ALIGN *******************
NM_006715	MAN2C1	4.76e-22	200	uc002baf.2	89.9	93.2	84.2	86.8	HUMAN NTLPWKRIEVMALPKPGGA
			200						MOUSE NTLPWKRTEVLALPKPCGA
			200						ALIGN ******* **:***** **
NM_024640	YRDC	4.7e-22	201	uc001cca.1	81.4	84.4	73.7	76.3	HUMAN SPAPAAPGARLLRLPGSGA
			201						MOUSE EPAPALPGARLLRLPESEP
			201						ALIGN .**** ********* * .
NM_203305	FAM102A	4.67e-22	203	uc004bsw.1	56.5	57.4	100	100	HUMAN PEKPPRPPRPLHLSDRSFR
			203						MOUSE PEKPPRPPRPLHLSDRSFR
			203						ALIGN *******************
NM_152892	LRWD1	4.56e-22	204	uc003uzn.2	77.5	84.2	73.7	86.8	HUMAN SDRLGKIRSLDLSGLELLS
			204						MOUSE TDKLGKIQSLNLSGLQLLS
			204						ALIGN :*:****:**:****:***
NM_003203	C2orf3	4.55e-22	205	uc002sno.2	69.1	77.5	15.8	25	HUMAN EESPAEPGAPRELPVPGSA
			205						MOUSE ----SD-GA-KEQS-----
			205						ALIGN :: ** :* .
NM_002140	HNRNPK	4.54e-22	206	uc004anl.3	100	100	100	100	HUMAN PGRGGRGGSRARNLPLPPP
			206						MOUSE PGRGGRGGSRARNLPLPPP
			206						ALIGN *******************
NM_178123	SESTD1	4.53e-22	207	uc002uni.3	98.3	99.1	94.7	97.4	HUMAN GNQQEKERSVDLNFLPSVD
			207						MOUSE GNEQEKERSVDLNFLPSVD
			207						ALIGN **:****************
NM_054027	ANKH	4.53e-22	208	uc003jfm.3	97.8	98.5	100	100	HUMAN ILATQRISRPIVNLFVSRD
			208						MOUSE ILATQRISRPIVNLFVSRD
			208						ALIGN *******************
NM_001830	CLCN4	4.5e-22	209	uc004csy.3	96.8	97.4	100	100	HUMAN SPHPLKLRRILNLSPFTVT
			209						MOUSE SPHPLKLRRILNLSPFTVT
			209						ALIGN *******************
NM_018346	RSAD1	4.39e-22	210	uc002iqw.1	84.6	89.2	89.5	92.1	HUMAN RLFPGRVSVDLMLGLPAQQ
			210						MOUSE LLFPGRVSVDLMLGLPAQK
			210						ALIGN *****************:
NM_015099	CAMTA2	4.31e-22	211	uc002gah.1	92.4	94.4	100	100	HUMAN VLFEYRARRFLSLPSTQLD
			211						MOUSE VLFEYRARRFLSLPSTQLD
			211						ALIGN *******************
NM_001836	CMA1	4.3e-22	212	uc001wpp.1	70.4	76.3	89.5	92.1	HUMAN MLLKLKEKASLTLAVGTLP
			212						MOUSE MLLKLKEKAKLTLGVGTLP
			212						ALIGN *********.***.*****
NM_012411	PTPN22	4.26e-22	213	uc001edu.2	59	65.5	73.7	77.6	HUMAN DSVILRPSKSVKLRSPKSG
			213						MOUSE DSVGFTPSKNVKLRSPKSD
			213						ALIGN *** : ***.********
NM_021221	LY6G5B	4.17e-22	214	uc011ffx.1	61.2	70.9	42.1	51.3	HUMAN SSLPEPHDRPLALPLSDSQ
			214						MOUSE STLRGSPGSHLGMPLSASQ
			214						ALIGN *:* . . *.:*** **
NM_133444	ANF526	4.03e-22	216	uc002osz.1	86.6	90	94.7	97.4	HUMAN HQRVHARARTLTLQPPRSP
			216						MOUSE HQRVHARARSLTLQPPRSP
			216						ALIGN *********:*********
NM_182540	DDX26B	3.98e-22	217	uc004eyw.3	90.4	93.2	89.5	93.4	HUMAN SPMSSKRRRSMSLLLRKPQ
			217						MOUSE SPMSSKRRRSMSLLLRRAQ
			217						ALIGN ****************:.*
NM_001080517	SETD5	3.98e-22	218	uc003brt.2	94	95.7	94.7	96.1	HUMAN SSLPSDLRTISLPSAGQSA
			218						MOUSE SSLPSDLRTISLPNAGQSA
			218						ALIGN *************.*****
NM_006646	WASF3	3.9e-22	219	uc001uqv.2	93.6	95.6	94.7	96.1	HUMAN PSASARHMALNRPQQPPPP
			219						MOUSE SSASARHMALNRPQQPPPP
			219						ALIGN .******************
NM_002895	RBL1	3.81e-22	220	uc002xgi.2	90.4	93.7	78.9	85.5	HUMAN STGINRPKRTGSLALFYRK
			220						MOUSE LTGVSKPKRTGSLALFYRK
			220						ALIGN **:.:*************
NM_001897	CSPG4	3.77e-22	221	uc002baw.2	83.3	88.8	78.9	85.5	HUMAN RPAIQIHRSTGLRLAQGSA
			221						MOUSE RPAIQILHNTGLHLAQGSA
			221						ALIGN ****** :.***:******
NM_001076785	SLC7A6	3.71e-22	222	uc002evu.1	89.1	92.9	78.9	82.9	HUMAN SSPPQRSSETMQLKKEISL
			222						MOUSE GSPSQGSPETMQLKKEISL
			222						ALIGN .**.* *.***********
NM_005019	PDE1A	3.65e-22	225	uc002uoq.1	92.7	95.5	100	100	HUMAN FLQGDKEAELGLPFSPLCD
			225						MOUSE FLQGDKEAELGLPFSPLCD
			225						ALIGN *******************
NM_024602	HECTD3	3.55e-22	226	uc009vxk.2	97.8	98.5	100	100	HUMAN KIKSSRQRELGLNADLFQP
			226						MOUSE KIKSSRQRELGLNADLFQP
			226						ALIGN *******************
NM_031913	ESYT5	3.53e-22	227	uc003esk.2	83.2	87.6	89.5	93.4	HUMAN VTVPVKKGLDLTNLRFPLP
			227						MOUSE VTVPVKKGLDVTNLRVPLP
			227						ALIGN **********:****.***
NM_024675	PALB2	3.38e-22	228	uc002dlx.1	58.8	67.3	47.4	57.9	HUMAN SEILSQPKSLSLEATSPLS
			228						MOUSE DEILGPSKNFNLAAVSPPS
			228						ALIGN .***. .*.:.* *.** *
NM_017848	FAM120C	3.37e-22	229	uc004dsz.3	92.1	94.4	75	78.8	HUMAN APRAARGSVPLQPP-LPPAA
			229						MOUSE APRITRGSAPLPPPPLPPAA
			229						ALIGN *** :***.** ** *****
NM_015545	PTCD1	3.36e-22	230	uc003uqh.2	73.1	80.9	68.4	78.9	HUMAN ALQVWRLMLSLGLQPSRDS
			230						MOUSE AMQVWRQMLSLGIKPSRHG
			230						ALIGN *:**** *****::***..
NM_020443	NAV1	3.36e-22	231	uc001gwu.2	95.8	97	89.5	93.4	HUMAN SSALSSPRRSLGLALTHSF
			231						MOUSE SSALSSPRRSLGLALSHPF
			231						ALIGN ***************:*.*
NM_014761	KIAA0174	3.33e-22	233	uc002fbk.1	78	80.7	15.8	27.6	HUMAN VPAPQHLKTLTLMIFPGGL
			233						MOUSE TSASEDIDFDDLSRRFEEL
			233						ALIGN ..*.:.:. * *
NM_005270	GLI2	3.26e-22	234	uc010flo.1	93.3	95.4	100	100	HUMAN PRVTPRLSRKRALSISPLS
			234						MOUSE PRVTPRLSRKRALSISPLS
			234						ALIGN *******************
NM_012267	HSPBP1	3.23e-22	235	uc002qkc.2	95	96.3	84.2	89.5	HUMAN SDEGSRGSRLPLALPPASQ
			235						MOUSE ADKGSGGSRLPLALPPASQ
			235						ALIGN :*:** *************
NM_001029870	ANKRD56	3.17e-22	236	uc003hki.2	64.8	71.4	73.7	81.6	HUMAN ALAPHRTSEHKSSLVPLDA
			236						MOUSE ALIPHRPSEHRSPLVPLDT
			236						ALIGN ** ***.***:*.*****:
NM_014630	ANF592	3.17e-22	237	uc002bld.2	84.2	87.2	84.2	86.8	HUMAN APANLLPKAVHLANLNLVP
			237						MOUSE -AASLLPKAVHLANLNLVP
			237						ALIGN .*.***************
NM_004723	ARHGEF2	3.17e-22	238	uc001fmr.2	88.5	91.9	68.4	78.9	HUMAN VELLLTPREPALPLEPDSG
			238						MOUSE VDLPMTSREPALPLDSDSG
			238						ALIGN *:* :*.*******:.***
NM_004716	PCSK7	3.14e-22	239	uc001pqr.2	85.9	89.1	100	100	HUMAN SITHPRRGSLELKLFCPSG
			239						MOUSE SITHPRRGSLELKLFCPSG
			239						ALIGN *******************
NM_014876	JOSD1	3.04e-22	241	uc003awf.2	97	98.3	84.2	89.5	HUMAN PWKGDKAKSESLELPQAAP
			241						MOUSE PWKGDKAKAESSDLPQAAP
			241						ALIGN ********:** :******
NM_001039707	SDCCAG3	3.02e-22	242	uc004chi.2	80	85.7	73.7	81.6	HUMAN PGATPLSRARSLAIPDAPA
			242						MOUSE QGAPPLSRTRSLVVPDAPA
			242						ALIGN **.****:***.:*****
NM_198501	SMTNL2	3.01e-22	243	uc002fye.2	57.9	61.5	78.9	84.2	HUMAN FSAPDPPRPRPVSLSLRLP
			243						MOUSE -SAQEPPRPRPVSLSLRMP
			243						ALIGN ** :************:*
NM_033626	CCDC120	3e-22	244	uc004dmf.2	89.2	92.4	78.9	80.3	HUMAN QLRDVRARLGLPVLPLPQP
			244						MOUSE QLRDFRARLGLPVL---QP
			244						ALIGN ****.********* **
NM_152795	HIF3A	2.97e-22	245	uc002peh.2	82.4	86.6	100	100	HUMAN STLTSRGRTLNLKAATWKV
			245						MOUSE STLTSRGRTLNLKAATWKV
			245						ALIGN *******************
NM_006526	ZNF217	2.95e-22	246	uc002xwq.3	68.6	76.2	63.2	71.1	HUMAN SPAPDKTKRPETKLKPLPV
			246						MOUSE PAAMDKVKRPEPKLKSLPA
			246						ALIGN ..* **.****.***.**.
NM_020870	SH3RF1	2.91e-22	247	uc003isa.1	90.2	93.1	78.9	86.8	HUMAN AEPSGRIVTVLPGLPTSPD
			247						MOUSE TEPSGRTVTILPGLPTSPE
			247						ALIGN :***** **:********:
NM_016442	ERAP1	2.9e-22	248	uc003kml.2	83.6	88.2	89.5	94.7	HUMAN ASFSIKIRREPRHLAISNM
			248						MOUSE ASFSIKIKRDPRHLAISNM
			248						ALIGN *******:*:*********
NM_030650	KIAA1715	2.88e-22	249	uc002ukc.1	84.7	88.7	94.7	96.1	HUMAN DEFTARLAMTLPFFAFPLI
			249						MOUSE DEFTARLVMTLPFFAFPLI
			249						ALIGN *******.***********
NM_198488	FAM83H	2.8e-22	250	uc003yzk.2	83.6	87.1	73.7	80.3	HUMAN PPVPERRGSLTLTISGESP
			250						MOUSE PPVPERRGSLTF--AGESS
			250						ALIGN ***********: :***.
NM_033427	CTTNBP2	2.78e-22	251	uc003vjf.2	85	89.3	94.7	96.1	HUMAN PQLPPKPSIDLTVAPAGCA
			251						MOUSE PQLPPKPSIDLTVAPAGCP
			251						ALIGN ******************.
NM_018192	LEPREL1	2.77e-22	252	uc011bsk.1	89.1	91.7	61.9	64.3	HUMAN GGPPDSPRRELELEP--GPLQ
			252						MOUSE GGPQDG-RRSPEPEPERGPLQ
			252						ALIGN *** *. **. * ** ****
NM_022719	DGCR14	2.77e-22	253	uc002zou.2	92.7	95.1	100	100	HUMAN ILEPGRRERLGLKMANEAA
			253						MOUSE ILEPGRRERLGLKMANEAA
			253						ALIGN *******************
NM_005167	PPM1J	2.67e-22	256	uc001ect.1	88.2	91.5	78.9	84.2	HUMAN VEARASFSRPTFLQLSPGG
			256						MOUSE AETTVSFSRPTFLQLSPGG
			256						ALIGN .*: .**************
NM_018451	CENPJ	2.67e-22	257	uc001upt.3	73.2	80	60	66.3	HUMAN VSEPSR-SSSLSLSKMDFDD
			257						MOUSE VLEPLRLPSSQAGSKIDFDD
			257						ALIGN * ** * .** : **:****
NM_000089	COL1A2	2.62e-22	258	uc003ung.1	89.7	92.6	100	100	HUMAN EYKTNKPSRLPFLDIAPLD
			258						MOUSE EYKTNKPSRLPFLDIAPLD
			258						ALIGN *******************
NM_198467	RSBN1L	2.6e-22	259	uc010ldt.1	81.1	85.6	63.2	69.7	HUMAN PIASVRIKEEPVNVNIPEK
			259						MOUSE PGAALRIKEEPGMAPIPEK
			259						ALIGN * *::****** . ****
NM_017938	FAM70A	2.54e-22	261	uc004eso.3	94.6	96.4	100	100	HUMAN SLTQQRSSDMSLPDSMGAF
			261						MOUSE SLTQQRSSDMSLPDSMGAF
			261						ALIGN *******************
NM_001080519	BAHCC1	2.54e-22	262	uc002kaf.2	79.9	85.1	84.2	89.5	HUMAN IGAEAKRKSLELASLGYSG
			262						MOUSE SGAETKRKSVELASLGYSG
			262						ALIGN ***:****:*********
NM_014808	FARP2	2.51e-22	264	uc002wbi.1	82.6	87.3	63.2	69.7	HUMAN PSPSSRKSPLSLSPAFQVP
			264						MOUSE PSPSSLKSHLSLCPELQAA
			264						ALIGN ***** ** ***.* :*..
NM_001079669	TMTC4	2.5e-22	266	uc001vou.2	90.6	93.7	89.5	90.8	HUMAN SEDGHKRRILTLGLGFLVI
			266						MOUSE SEDSCKRRILTLGLGFLVI
			266						ALIGN ***. **************
NM_015503	SH2B1	2.5e-22	267	uc002drm.2	92.9	94.9	94.7	94.7	HUMAN GPCPATSPRPMTLPLAPGT
			267						MOUSE GPCPAISPRPMTLPLAPGT
			267						ALIGN ***** *************
NM_018058	CRTAC1	2.45e-22	268	uc001kov.2	92.6	94.4	84.2	89.5	HUMAN SSAASRISEPLSRASYLSL
			268						MOUSE SSAAFRLSEPLSQASYLSL
			268						ALIGN **** *:*****:******
NM_023068	SIGLEC1	2.44e-22	269	uc002wja.2	72.5	80.2	78.9	89.5	HUMAN PGRAPRLSRPITLDVLYAP
			269						MOUSE PGHAPHLSRPVTLDVLHAP
			269						ALIGN **:**:****:*****:**
NM_003048	SLC9A2	2.43e-22	270	uc002tca.2	91	93.6	73.7	82.9	HUMAN PEKLQKRRTISIADGNSSD
			270						MOUSE PEKLQKKKKVSNADGNSSD
			270						ALIGN ******::.:* *******
NM_194312	ESPNL	2.43e-22	271	uc002vxq.3	79.2	84.1	78.9	81.6	HUMAN DTEPGRKSGLTLLGPLPHA
			271						MOUSE DVEPGRKLGLTPLGSLPHA
			271						ALIGN *.***** *** **.****
NM_001042422	SLC16A3	2.42e-22	272	uc002kea.2	88.5	91.9	78.9	82.9	HUMAN SGPPRPSRRLLDLSVFRDR
			272						MOUSE RGPQRPPQRLLDLSVFRDR
			272						ALIGN ** **.:***********
NM_178128	FADS6	2.35e-22	273	uc002jmd.1	76.6	82.7	84.2	90.8	HUMAN DNKPRRIHMMSLGVLNLAR
			273						MOUSE DKKPRRIHMMTLGVLNLPR
			273						ALIGN *:********:******.*
NM_006544	EXOC5	2.3e-22	274	uc001xct.2	98.4	99	100	100	HUMAN DLKERIRQRTNLPLGPSID
			274						MOUSE DLKERIRQRTNLPLGPSID
			274						ALIGN *******************
NM_001037335	PRIC285	2.3e-22	275	uc002yfm.2	62.6	69.9	84.2	89.5	HUMAN AQSYQRRARSLHLAVQLKA
			275						MOUSE AQSYQRRAYSLHLAIQLKS
			275						ALIGN ******** *****:***:
NM_014170	GTPBP8	2.3e-22	276	uc003dzn.2	75.8	81.8	40	48.8	HUMAN FLAP-YGRQDLHLRIFDPSP
			276						MOUSE HLAADSGPGLIEQRLFDPSL
			276						ALIGN .**. * :. *:****
NM_003737	DCHS1	2.3e-22	277	uc001mem.1	34.7	35.6	89.5	93.4	HUMAN HNPPGRLAPVTLSLSGGDP
			277						MOUSE HNPPGRLGPVTLTLSGGDP
			277						ALIGN *******.****:******
NM_001012968	SPIN4	2.29e-22	279	uc004dvf.2	96	97.5	100	100	HUMAN GLELHRDKRVLALEILPER
			279						MOUSE GLELHRDKRVLALEILPER
			279						ALIGN *******************
NM_006311	NCOR1	2.27e-22	280	uc002gpo.2	90.3	92.6	89.5	94.7	HUMAN VSSPLKPNPLDLPQLQHRA
			280						MOUSE ISSPIKPNPLDLPQLQHRA
			280						ALIGN :***:**************
NM_015346	ZFYVE26	2.26e-22	281	uc001xka.2	82.4	87.7	84.2	90.8	HUMAN SWKELRGRREVPLAAEQVA
			281						MOUSE SWKELRGRREAPLTAEKVA
			281						ALIGN **********.**:**:**
NM_022453	RNF25	2.24e-22	282	uc002vit.2	81.9	86.7	68.4	77.6	HUMAN PPPEGPLKEPMDLKPEPHS
			282						MOUSE PPPEKPLKETVDLKAEPRN
			282						ALIGN **** ****.:***.**:.
NM_024336	IRX3	2.22e-22	283	uc002eht.1	91.1	93.3	78.9	89.5	HUMAN SLAGAARRDGDLGLGPISD
			283						MOUSE TLAGAAHRNGDFGLGPISD
			283						ALIGN :*****:*:**:*******
NM_001080453	INTS1	2.22e-22	284	uc003skn.2	86.8	90.1	94.7	97.4	HUMAN DSVLGRRCRDLLLQLYLQR
			284						MOUSE DSVLGQRCRDLLLQLYLQR
			284						ALIGN *****:*************
NM_030626	LRRC27	2.2e-22	285	uc010quw.1	54.6	65.2	26.3	38.2	HUMAN TSQEAPPVREMTLRDLPSP
			285						MOUSE LPEVSAP--KMGSNDLQYP
			285						ALIGN .: :.* :* .** *
NM_001127511	APC	2.19e-22	286	uc010jby.2	90.5	93.5	89.5	92.1	HUMAN IDLLERLKELNLDSSNFPG
			286						MOUSE IDLLERLKEFNLDS-NFPG
			286						ALIGN *********:**** ****
NM_031293	PMFBP1	2.17e-22	287	uc002fcd.2	69.4	78.2	94.7	96.1	HUMAN SSLNSKLLSLQLDIKNLHD
			287						MOUSE SNLNSKLLSLQLDIKNLHD
			287						ALIGN *.*****************
NM_138447	ZNF689	2.14e-22	288	uc002dyx.2	92.2	94.4	89.5	92.1	HUMAN RPSRKRGRRPRALKFVDVA
			288						MOUSE GPTRKRGRRPRALKFVDVA
			288						ALIGN *:****************
NM_014521	SH3BP4	2.14e-22	289	uc002vvp.2	91.6	94.3	89.5	92.1	HUMAN SLDELNPKSTVDLLLFDAG
			289						MOUSE STDELNPKSTVDLLLFDTG
			289						ALIGN * ***************:*
NM_006920	SCN1A	2.13e-22	290	uc010zcz.1	98.1	99	100	100	HUMAN SNLSQTSRSSRMLAVFPAN
			290						MOUSE SNLSQTSRSSRMLAVFPAN
			290						ALIGN *******************
NM_020314	C16orf62	2.12e-22	291	uc002dgn.1	93.6	95.6	94.7	94.7	HUMAN DEALKRQSSLGLSFFNSIL
			291						MOUSE DEALKRQSLLGLSFFNSIL
			291						ALIGN ******** **********
NM_018325	C9orf72	2.11e-22	292	uc003zqq.2	98.1	99.1	100	100	HUMAN AEKVNKIVRTLCLFLTPAE
			292						MOUSE AEKVNKIVRTLCLFLTPAE
			292						ALIGN *******************
NM_001465	FYB	2.1e-22	293	uc003jlt.2	77	83.3	78.9	82.9	HUMAN FLKPVGPKPINLPKEDSKP
			293						MOUSE FLKPVSPKPTSLTKEDSKP
			293						ALIGN *****.*** .*.******
NM_002056	GFPT1	2.09e-22	294	uc002sfh.2	99.1	99.4	100	100	HUMAN ISMQERRKEIMLGLKRLPD
			294						MOUSE ISMQERRKEIMLGLKRLPD
			294						ALIGN *******************
NM_005584	MAB21L1	2.09e-22	295	uc001uvc.2	100	100	100	100	HUMAN CLSILKTLRDRHLELPGQP
			295						MOUSE CLSILKTLRDRHLELPGQP
			295						ALIGN *******************
NM_020230	PPAN	2.09e-22	296	uc002mmz.1	73.6	80	5.3	26.3	HUMAN EEASGIPSRTASLELGEDD
			296						MOUSE GDSDAEDPGAPPEAVGAGQ
			296						ALIGN ::.. . :.. :* .:
NM_002583	PAWR	2.08e-22	297	uc001syx.2	76.8	82.8	100	100	HUMAN EEMIGKLKEEIDLLNRDLD
			297						MOUSE EEMIGKLKEEIDLLNRDLD
			297						ALIGN *******************
NM_052899	GPRIN1	2.07e-22	298	uc003meo.1	55	62.6	63.2	69.7	HUMAN PLASGKGEPVSLGKADSAP
			298						MOUSE PPTT--VEPVSLGKADSAS
			298						ALIGN * :: ***********.
NM_022068	FAM38B	2.07e-22	299	uc002kor.3	79.2	81.6	84.2	89.5	HUMAN SLGHGRRDSSDSLKSINLA
			299						MOUSE SLDQGRRGSSDSLKSINLA
			299						ALIGN **.:***.***********
NM_031989	PCBP2	2.07e-22	301	uc001sdb.3	100	100	100	100	HUMAN STAASRPPVTLRLVVPASQ
			301						MOUSE STAASRPPVTLRLVVPASQ
			301						ALIGN *******************
NM_015080	NRXN2	2.06e-22	302	uc001oar.2	97.8	98.3	100	100	HUMAN DPVTFKSRSSYLALATLQA
			302						MOUSE DPVTFKSRSSYLALATLQA
			302						ALIGN *******************
NM_005633	SOS1	2.06e-22	303	uc002rrk.3	96.6	97.5	89.5	93.4	HUMAN QSAIEKRKRRNPLSLPVEK
			303						MOUSE QSAIEKRKRRNPLSLPAER
			303						ALIGN ****************.*:
NM_007204	DDX20	2.02e-22	304	uc001ebs.2	82.3	87.2	100	100	HUMAN AAGFERPSPVQLKAIPLGR
			304						MOUSE AAGFERPSPVQLKAIPLGR
			304						ALIGN *******************
NM_002088	GRIK5	2.02e-22	305	uc002osj.1	98.8	99.1	100	100	HUMAN ALLSLRAVREMRLSNGKLY
			305						MOUSE ALLSLRAVREMRLSNGKLY
			305						ALIGN *******************
NM_173054	RELN	1.97e-22	306	uc010liz.2	95.1	96.9	100	100	HUMAN FSDFSKPRFVYLELPAAAK
			306						MOUSE FSDFSKPRFVYLELPAAAK
			306						ALIGN *******************
NM_004260	RECQL4	1.97e-22	307	uc003zdj.2	64.2	71.9	89.5	94.7	HUMAN ALLYSRRSPCLTLVVSPLL
			307						MOUSE ALLYAQRSPCLTLVVSPLL
			307						ALIGN ****::*************
NM_001024611	LRRC66	1.97e-22	308	uc003gzi.2	46.2	56.7	36.8	42.1	HUMAN GTPQSRISRETRLPPIHLH
			308						MOUSE ETHQIRKSRDTHLLLSPPS
			308						ALIGN * * * **:*:*
NM_152424	FAM123B	1.95e-22	309	uc004dvo.2	78.1	82.9	84.2	86.8	HUMAN EGEWSRDSPLSLYTEPPGA
			309						MOUSE -GEWGRDSPLSLYTEPPGV
			309						ALIGN ***.*************.
NM_152759	LRRC43	1.94e-22	311	uc001ubw.3	45.4	50.9	84.2	88.2	HUMAN SLRTLRHLRLLVLQGNPLA
			311						MOUSE GLSTLRHLRLLVLQGNPLS
			311						ALIGN .* ***************:
NM_030582	COL18A1	1.94e-22	312	uc002zhi.2	67.5	72.7	73.7	84.2	HUMAN QRMPLARSSRGLELEPGAG
			312						MOUSE QRVPFARASQGLELERGAG
			312						ALIGN **:*:**:*:***** ***
NM_032387	WNK4	1.93e-22	313	uc002ibj.2	86.1	88.9	94.7	94.7	HUMAN RPRSSRLSRRSSVDLGLLS
			313						MOUSE RPRSSRPSRRSSVDLGLLS
			313						ALIGN ****** ************
NM_015074	KIF1B	1.9e-22	314	uc001aqw.3	97.1	98.2	78.9	86.8	HUMAN PEEISRINDLDLKSSTLLD
			314						MOUSE PEEVNRMNDLDLKSGTLLD
			314						ALIGN ***:.*:*******.****
NM_005854	RAMP2	1.9e-22	315	uc010cyt.2	63.2	70.7	53.8	56.7	HUMAN RTRVGRPAALR-------LLLLLGAV
			315						MOUSE VTRAQRPTALCLPPLLLLLLLLLGAV
			315						ALIGN **. **:** ********
NM_004321	KIF1A	1.87e-22	318	uc002vzy.2	97.6	98.4	100	100	HUMAN VLSPLRPSRRHFPRVMPLS
			318						MOUSE VLSPLRPSRRHFPRVMPLS
			318						ALIGN *******************
NM_001098784	FAM89B	1.87e-22	319	uc001oen.2	58.5	62.8	89.5	93.4	HUMAN AGPAAGPRRPVNLDSALAA
			319						MOUSE SGSAAGPRRPVNLDSALAA
			319						ALIGN :*.****************
NM_015638	TRPC4AP	1.87e-22	320	uc002xbl.2	97.5	98.3	100	100	HUMAN ILMLARRKERLPLYLRLLQ
			320						MOUSE ILMLARRKERLPLYLRLLQ
			320						ALIGN *******************
NM_013356	SLC16A8	1.87e-22	321	uc003auu.2	82	84.5	63.2	65.8	HUMAN SPRVRPRRRLLDLAVCTDR
			321						MOUSE ------RRRLLDVAVCTDR
			321						ALIGN ******:******
NM_017676	GIN1	1.86e-22	322	uc003koa.1	85.4	89.9	84.2	88.2	HUMAN SGAHHGISRTLTLVESNYY
			322						MOUSE PGVHHGISRTLTLVESGYY
			322						ALIGN .*.*************.**
NM_007207	DUSP10	1.86e-22	323	uc001hmy.1	96.5	97.7	100	100	HUMAN VVALSRPVRPQDLNLCLDS
			323						MOUSE VVALSRPVRPQDLNLCLDS
			323						ALIGN *******************
NM_001003845	SP5	1.85e-22	324	uc002uge.2	97.5	98.3	100	100	HUMAN SPDLGKHSPLALLAATCSR
			324						MOUSE SPDLGKHSPLALLAATCSR
			324						ALIGN *******************
NM_014722	FAM65B	1.84e-22	325	uc003neo.1	85.4	88.7	94.7	94.7	HUMAN KPAVSRSRSSSLSLTVESA
			325						MOUSE KPAGSRSRSSSLSLTVESA
			325						ALIGN *** ***************
NM_205859	OR2K2	1.81e-22	326	uc011lwp.1	86.1	90.6	89.5	94.7	HUMAN TILDSRLKTPMYLFLGNLS
			326						MOUSE TVLDSRLQTPMYLFLGNLS
			326						ALIGN *:*****:***********
NM_078471	MYO18A	1.8e-22	327	uc002hdu.1	94.5	96.4	89.5	92.1	HUMAN SLASQLKSEELNLPEGKVR
			327						MOUSE SLASQLKSEELSLPEGKAR
			327						ALIGN ***********.*****.*
NM_198255	TERT	1.75e-22	329	uc003jca.1	61.5	70.4	31.6	50	HUMAN PGARRRGGSASRSLPLPKR
			329						MOUSE RGTKRHLSLTSTSVPSAKK
			329						ALIGN *::*: . :* *:* .*:
NM_003190	TAPBP	1.74e-22	330	uc011idf.1	72.3	79.2	89.5	94.7	HUMAN LPASGRSAEVTLEVAGLSG
			330						MOUSE LPASGRSADVTLEVAGFSG
			330						ALIGN ********:*******:**
NM_032407	PCDHGC5	1.73e-22	331	uc011dbc.1	81.5	84.3	84.2	89.5	HUMAN SPSLHKHLTIRLNISDVND
			331						MOUSE SPPLHTHLTLRLNISDVND
			331						ALIGN **.**.***:*********
NM_007118	TRIO	1.72e-22	332	uc003jff.2	96.4	97.5	100	100	HUMAN SSDSNKSSKSLQLDIIPAS
			332						MOUSE SSDSNKSSKSLQLDIIPAS
			332						ALIGN *******************
NM_138328	RHBDL3	1.72e-22	333	uc002hhe.1	95.5	97.2	94.7	97.4	HUMAN SSKLDPHKREVLLALADSH
			333						MOUSE SSKLDPHKKEVLLALADSH
			333						ALIGN ********:**********
NM_001008708	CHAC2	1.71e-22	334	uc002rxk.1	90.8	93.3	94.7	96.1	HUMAN RGVPGKPGRVVTLVEDPAG
			334						MOUSE RGVPGKPGRVVTLVEDPGG
			334						ALIGN *****************.*
NM_144720	JAKMIP1	1.7e-22	335	uc003giu.3	95.5	97.2	100	100	HUMAN RNELLKRSRETEVQLKPLV
			335						MOUSE RNELLKRSRETEVQLKPLV
			335						ALIGN *******************
NM_001372	DNAH9	1.67e-22	336	uc002gne.2	87.7	91.9	63.2	73.7	HUMAN PLLVVRPGPRGLAIRPGLE
			336						MOUSE PLLVVQSGPGGLVVTPGLD
			336						ALIGN *****:.** **.: ***:
NM_003501	ACOX3	1.67e-22	337	uc010idk.2	73.4	81.6	68.4	84.2	HUMAN SLSSGRVSIVSLAILNLKL
			337						MOUSE SLSSGRISIISMSVVNLKL
			337						ALIGN ******:**:*::::****
NM_001099436	ULK3	1.63e-22	338	uc010bkf.1	94.1	96.1	100	100	HUMAN SELEEKIRSNRVIELPLRP
			338						MOUSE SELEEKIRSNRVIELPLRP
			338						ALIGN *******************
NM_172071	RC3H1	1.6e-22	339	uc001gju.3	93.6	95.6	94.7	96.1	HUMAN SLLSNKTSSLNLSEDPEGG
			339						MOUSE SLLSNKTSSLNLSEDSEGG
			339						ALIGN ***************.***
NM_001712	CEACAM1	1.58e-22	340	uc002otv.2	57	67.5	73.7	81.6	HUMAN NPVSANRSDPVTLNVTYGP
			340						MOUSE NPVSVNRSDPFSLNIIYGP
			340						ALIGN ****.*****.:**: ***
NM_033071	SYNE1	1.58e-22	341	uc003qoy.2	36	38.1	36.8	53.9	HUMAN SLSVLRSKCKRNLEIPGKS
			341						MOUSE SLSWLKSRLKYLIDISSEN
			341						ALIGN *** *:*: * ::*..:.
NM_000214	JAG1	1.56e-22	342	uc002wnw.2	96.6	97.6	94.7	96.1	HUMAN PRTRGRSGRPLSLLLALLC
			342						MOUSE PRTRGRPGRPLSLLLALLC
			342						ALIGN ******.************
NM_138346	KIAA2013	1.56e-22	343	uc001atk.2	91.8	94.7	89.5	93.4	HUMAN REGLLRRVRCLQLGSPGPG
			343						MOUSE REGLLRRVRCLQLGTPGSG
			343						ALIGN **************:**.*
NM_002821	PTK7	1.52e-22	344	uc003oub.1	92	94.2	52.6	55.3	HUMAN RGSPARPRRLPLLSVLLLP
			344						MOUSE ----ARP--LTLLRALLLP
			344						ALIGN *** *.** .****
NM_020664	DECR2	1.51e-22	345	uc002chb.2	82.2	87	78.9	85.5	HUMAN AGATGRRCLPLSMDVRAPP
			345						MOUSE VAATGKRCLPLSMDVRVPP
			345						ALIGN ..***:**********.**
NM_017437	CPSF2	1.47e-22	347	uc001yah.1	98	98.9	100	100	HUMAN QIVNLKGKGHGLSITPLPA
			347						MOUSE QIVNLKGKGHGLSITPLPA
			347						ALIGN *******************
NM_002483	CEACAM6	1.46e-22	348	uc002orm.2	43.4	52.3	68.4	80.3	HUMAN NPASANRSDPVTLNVLYGP
			348						MOUSE NPVSVNRSDPFSLNIIYGP
			348						ALIGN **.*.*****.:**::***
NM_017434	DUOX1	1.45e-22	349	uc001zus.1	91	93.8	94.7	97.4	HUMAN VLSSNRGRRTLLLKIPKEY
			349						MOUSE ILSSNRGRRTLLLKIPKEY
			349						ALIGN :******************
NM_005477	HCN4	1.43e-22	350	uc002avp.2	95	96.4	100	100	HUMAN RQDPSRRSIRLRPLPSPSP
			350						MOUSE RQDPSRRSIRLRPLPSPSP
			350						ALIGN *******************
NM_025164	SIK3	1.43e-22	351	uc001ppy.2	88.2	90.9	89.5	92.1	HUMAN SLLCDRHKRHKTLRLGALP
			351						MOUSE SLLCDRHKKHKTLRPGALP
			351						ALIGN ********:***** ****
NM_207363	NCKAP5	1.42e-22	352	uc002ttp.2	63	71.3	63.2	71.1	HUMAN SKLPLRIPPKSEGLLIPPG
			352						MOUSE SKLPLRMLTRPEGLLTP-G
			352						ALIGN ******: .:.**** * *
NM_016484	PDZD11	1.42e-22	353	uc004dyd.1	97.1	98	89.5	92.1	HUMAN NELTQFLPRTITLKKPPGA
			353						MOUSE NELTQFLPRIVTLKKPPGA
			353						ALIGN ********* :********
NM_014324	AMACr	1.39e-22	354	uc003jig.2	77.2	84.1	57.9	68.4	HUMAN VSRLGRGKRSLVLDLKQPR
			354						MOUSE ENFLARGKRSLALDLKRSQ
			354						ALIGN . *.******.****:.:
NM_152547	BTNL9	1.39e-22	355	uc003mmt.2	67.8	73.9	84.2	89.5	HUMAN VLAPHRVALTLRVPPRRLG
			355						MOUSE VLDPHRVALALRVPPRRIG
			355						ALIGN ** ******:*******:*
NM_003469	SCG2	1.39e-22	356	uc002vnm.2	81.6	87.2	73.7	82.9	HUMAN PNGSVEPERELDLPVDLDD
			356						MOUSE PNGLVEPEQDLELAVDLDD
			356						ALIGN *** ****::*:*.*****
NM_000594	TNF	1.35e-22	358	uc011gcb.1	79.1	85.7	63.2	76.3	HUMAN PQREEFPRDLSLISPLAQA
			358						MOUSE PQRDEFPNGLPLISSMAQT
			358						ALIGN ***:***..*.***.:**:
NM_005702	ERAL1	1.35e-22	359	uc002hcy.1	62.5	67.2	89.5	89.5	HUMAN IISPGKQKRHHLELSLLED
			359						MOUSE IISPVKQKRHHLERSLLED
			359						ALIGN **** ******** *****
NM_001080423	GRIP2	1.33e-22	362	uc011avh.1	84.2	87.9	89.5	94.7	HUMAN RRREHKSSLSLASSTVGPG
			362						MOUSE RRKEHRSSLSLASSTVGPG
			362						ALIGN **:**:*************
NM_032229	SLITRK6	1.33e-22	363	uc001vll.1	89.2	93	89.5	94.7	HUMAN SEISVPPSRPFQLSLLNNG
			363						MOUSE SQISVPPSRPFHLSLLNNG
			363						ALIGN *:*********:*******
NM_006445	PRPF8	1.31e-22	364	uc002fte.2	99.9	99.9	100	100	HUMAN RPFNLRSGRTRRALDIPLV
			364						MOUSE RPFNLRSGRTRRALDIPLV
			364						ALIGN *******************
NM_017721	CC2D1A	1.28e-22	367	uc002mxp.2	82.5	87.8	89.5	89.5	HUMAN LEALSRGEPVDLSCLPPPP
			367						MOUSE LEALSRGELVDLSRLPPPP
			367						ALIGN ******** **** *****
NM_020733	HEG1	1.28e-22	368	uc003ehs.3	51.6	58	47.4	59.2	HUMAN DPPPSPARRALSLAPLAGA
			368						MOUSE GSLPSPAHR--TLLPVAGP
			368						ALIGN .. ****:* :* *:**.
NM_130773	CNTNAP5	1.26e-22	370	uc002tno.2	85	90	89.5	93.4	HUMAN ELQKGRLALHLNLGDSKAR
			370						MOUSE ELQKGRLALYLNLDDSKAR
			370						ALIGN *********:***.*****
NM_021982	SEC24A	1.25e-22	371	uc003kzs.2	88.5	91.7	100	100	HUMAN SSKGERRIRVHTLCLPVVS
			371						MOUSE SSKGERRIRVHTLCLPVVS
			371						ALIGN *******************
NM_001453	FOXC1	1.25e-22	372	uc003mtp.2	92	93.7	84.2	89.5	HUMAN SLPSARPLSLDGADSAPPP
			372						MOUSE SLPSARPLSLDAAEPAPPP
			372						ALIGN ***********.*:.****
NM_020901	PHRF1	1.25e-22	373	uc001lqe.2	68	74.8	78.9	86.8	HUMAN ATTRSRIARTLGLRRPVHS
			373						MOUSE VTARSRIARTLGLRRPVRG
			373						ALIGN .*:**************:.
NM_018214	LRRC1	1.23e-22	374	uc003pcd.1	93.1	95.7	94.7	97.4	HUMAN SLTALKLKALWLSDNQSQP
			374						MOUSE SLTTLKLKALWLSDNQSQP
			374						ALIGN ***:***************
NM_000255	MUT	1.22e-22	375	uc003ozg.3	94.8	96.7	84.2	89.5	HUMAN SIKPLYSKRDTMDLPEELP
			375						MOUSE SIKPLYSRADTLDLPEELP
			375						ALIGN *******: **:*******
NM_005234	NR2F6	1.21e-22	376	uc002nfq.2	91.9	93.1	100	100	HUMAN PSQPQRFGRLLLRLPALRA
			376						MOUSE PSQPQRFGRLLLRLPALRA
			376						ALIGN *******************
NM_152788	ANKS1B	1.19e-22	377	uc001tge.1	22.9	23.5	100	100	HUMAN DDPPQKPPRSITLREPSGN
			377						MOUSE DDPPQKPPRSITLREPSGN
			377						ALIGN *******************
NM_001243	TNFRSF8	1.19e-22	378	uc001atq.2	49	56.9	31.6	43.4	HUMAN SLLVDSQASKTLPIPTSAP
			378						MOUSE SLVVDAWTSSRM-----QP
			378						ALIGN **:**: :*. : *
NM_031935	HMCN1	1.19e-22	379	uc001grq.1	87.3	91.6	73.7	78.9	HUMAN SPAGHKSRSFSLNVFVSPT
			379						MOUSE NIAGDKSKSFRLNVFVSPT
			379						ALIGN . **.**:** ********
NM_178468	FAM83C	1.18e-22	380	uc010zux.1	77.5	82.1	63.2	69.7	HUMAN SPRALRPPPVALAFRPDVP
			380						MOUSE MPQVPRPPPVTLAFGPAVP
			380						ALIGN *:. *****:*** * **
NM_172231	SF4	1.18e-22	381	uc002nmh.2	89.2	92.9	63.2	76.3	HUMAN SLLISRRTGLGLASLPGPV
			381						MOUSE PLVLSKRTGLGLSSPTGPV
			381						ALIGN .*::*:******:* .***
NM_033025	SYDE1	1.18e-22	382	uc002nah.1	87.2	90.9	94.7	96.1	HUMAN VAPYLRPKRQPPLHLPLAD
			382						MOUSE VAPYLRPKRQPPLHLPLAG
			382						ALIGN ******************.
NM_032518	COL25A1	1.14e-22	383	uc003hzg.2	85.9	88.5	100	100	HUMAN HEALQRITTLTVTGPPGPP
			383						MOUSE HEALQRITTLTVTGPPGPP
			383						ALIGN *******************
NM_001029880	SFMBT2	1.14e-22	384	uc009xio.1	64.2	70.3	15.8	21.1	HUMAN EVPSARPRRAVTLRSGSEP
			384						MOUSE GVPAGVPED----------
			384						ALIGN **:. *.
NM_006393	NEBL	1.13e-22	385	uc001iqi.2	44.7	46.9	94.7	94.7	HUMAN FEKEIKGRSSLDLDKTPEF
			385						MOUSE FEKEIKGRSSLDLDKTPAF
			385						ALIGN ***************** *
NM_052916	RNF157	1.13e-22	386	uc002jqz.2	92.5	94.5	100	100	HUMAN FRALLQIRAMRKKLGPLSP
			386						MOUSE FRALLQIRAMRKKLGPLSP
			386						ALIGN *******************
NM_012088	GLS	1.1e-22	387	uc002ngw.2	88.8	92.7	100	100	HUMAN SPKPPPQRVTLTLPVLNAA
			387						MOUSE SPKPPPQRVTLTLPVLNAA
			387						ALIGN *******************
NM_005224	ARID3A	1.09e-22	389	uc002lql.2	80.3	84.9	100	100	HUMAN ITVPGRLPVSLAGHPVVAA
			389						MOUSE ITVPGRLPVSLAGHPVVAA
			389						ALIGN *******************
NM_004836	EIF2AK3	1.09e-22	390	uc002stc.3	87.2	90.8	78.9	85.5	HUMAN ATLSISPPRPTTLSLDLTK
			390						MOUSE TTLSTSPTRPTTLSLDFTK
			390						ALIGN :*** **.********:**
NM_133378	TTN	1.08e-22	391	uc010zfg.1	73.8	75.9	100	100	HUMAN SSPSDPSKFTLAVSPVDPP
			391						MOUSE SSPSDPSKFTLAVSPVDPP
			391						ALIGN *******************
NM_019113	FGF21	1.08e-22	392	uc002pkn.1	75.2	81	52.6	61.8	HUMAN DPAPRGPARFLPLPGLPPA
			392						MOUSE DATSWGPVRFLPMPGLLHE
			392						ALIGN *.:. **.****:***
NM_080875	MIB2	1.07e-22	393	uc010nyq.1	90.9	93.4	89.5	94.7	HUMAN SYTNHRGRSPLDLAAEGRV
			393						MOUSE SYANHRGRSPLDLATEGRV
			393						ALIGN **:***********:****
NM_001077686	AGAP8	1.06e-22	394	uc009xom.2	62.8	69	78.9	88.2	HUMAN HSLGTRLSRVRSLELDDWP
			394						MOUSE RNLGTHLSRVRSLDLDDWP
			394						ALIGN :.***:*******:*****
NM_153334	SCARF2	1.05e-22	396	uc002zsj.1	81.9	85	57.9	61.8	HUMAN PTRRPRPRRELSLGRKKAP
			396						MOUSE -----SARRELTLGRKKAP
			396						ALIGN .****:*******
NM_025176	NINL	1.04e-22	397	uc002wux.1	52.9	61.1	31.6	39.5	HUMAN SGLGALPARRDLTLELEEP
			397						MOUSE SWLEAQHAACCESLSLQHQ
			397						ALIGN * * * * :*.*:.
NM_014803	ZNF518A	1.04e-22	399	uc001klp.2	67.5	76.7	89.5	90.8	HUMAN RPRLSKDSIRTLRLFPFSS
			399						MOUSE RPRLPKDSSRTLRLFPFSS
			399						ALIGN ****.*** **********
NM_015719	COL5A3	1.01e-22	400	uc002mmq.1	48.1	51.2	89.5	93.4	HUMAN SIYDERGARQLGLALGPAL
			400						MOUSE SIYDEKGVRQLGLALGPAL
			400						ALIGN *****:*.***********
NM_001076786	QSER1	1.01e-22	401	uc001mua.2	66.6	72.4	68.4	78.9	HUMAN SSESSKPIELDGLPSDQFA
			401						MOUSE STESPTAIELDSLPSDQLA
			401						ALIGN *:**...****.*****:*
NM_139315	TAF6	1e-22	402	uc003utl.2	96	96.8	65.5	65.5	HUMAN ALQAQ----------QPRPTLTLSQAPQP
			402						MOUSE ALQAQQVNRTTLTITQPRPTLTLSQAPQP
			402						ALIGN ***** **************
NM_021824	NIF3L1	1e-22	403	uc002uwo.2	84.4	89.6	78.9	84.2	HUMAN ATMIDRIKRHLKLSHIRLA
			403						MOUSE AIMIERIKTHLKLSHLRLA
			403						ALIGN * **:*** ******:***
Average			404		81.8559	85.6609	82.2487	86.238
Median			404		85.9	89.6	89.5	92.1
Std Dev			404		14.6666	13.1577	19.2365	16.4474
High			404		100	100	100	100
Low			404		22.9	23.5	5.3	21.1

## Sheet: Table 3
Whisenant et al 2010 Supplementary Table 3
Name	NCBI ID	Sequence	D-finder Score	Array Positions	Peptide Array %	S.D.	Notes
MKK4 WT	NM_003010	SMQGKRKALKLNFANPP	1.53964e-19	1A, 3I, 6A, 8L	5.30003	0.719992	Positive control
MKK4 Mut		SMQGEAEALKGNFANPP		1B, 3J, 6B, 8M	0.316186	0.119704	Negative control
MKK7 DS2 WT	NM_145185	ISPQRPRPTLQLPLAND	1.9582e-18	1C, 3K, 6C, 8N	1	0	Positive control
MKK7 DS2 Mut		ISPQAPAPTAQAPAAND		1D, 3L, 6D, 8O	0.109369	0.0443863	Negative control
NR4A1	NM_173158	LTPEFIKPTMDLASPEA	1.21852e-21	1E, 3M	2.52584	1.41785
CNKSR1	NM_006314	SPHQRSPSLSLAPLSPR	8.57241e-22	1F, 3N	1.41354	0.644779
HNRPK	NM_002140	RGGRGGSRARNLPLPPP	4.54e-22	1G, 3O	2.54731	0.15812
SH3RF1	NM_020870	EPSGRIVTVLPGLPTSP	2.91e-22	1H, 3P	1.06135	0.362044	POSH
NCOR1	NM_006311	SSPLKPNPLDLPQLQHR	2.27241e-22	1I, 3Q	0.768149	0.1565
RARA	NM_000964	ISAKGAERVITLKMEIP	5.22328e-25	1J, 3R	1.1136	0.24807
RARG	NM_000966	TKGAERAITLKMEIPGP	3.57267e-25	1K, 3S	0.380245	0.0844953
MAP2	NM_031846	KSPATPKQLRLINQPLP	1.29418e-23	1L, 3T	5.85769	1.99957
MAP2	NM_031846	AIEQRSMSINLPMSCLD	7.44373e-25	1M, 4A	1.52932	0.8066
MAP2	NM_031846	DLHSKNKDDLTLSRSLG	1.42806e-25	1N, 4B	1.69919	0.389658
ITCH	NM_031483	TNSPKWKQPLTVIVTPV	1.30595e-25	1O, 4C	1.3678	0.14444
RANBP2	NM_006267	PSVSSETMDKPVDLSTR	3.22058e-24	1P, 4D	0.291627	0.0867144
MCL1	NM_021960	PEPLGKRPAVLPLLELV	1.90803e-24	1Q, 4E	0.593521	0.253151
ELK4	NM_001973	NNSSRSKKPKGLELAPT	1.42e-25	1R, 4F	1.51538	0.55099
PIK3R1	NM_181523	PPTPKPRPPRPLPVAPG	1.77972e-20	1S, 4G	1.083	0.225289
PKD1	NM_000296	SRLARASRGVDLATGPS	8.39333e-21	1T, 4H	1.50645	0.0141378
HIPK3	NM_005734	TALKKLKSLGLIHADLK	1.09101e-21	2A, 4I	2.99954	0.756988
AXIN1	NM_003502	TATPRRSDLDLGYEPEG	1.06812e-21	2B, 4J	4.89662	2.71264
WNK1	NM_018979	EKTSRPKLRILNVSNKG	6.27552e-22	2C, 4K	1.41409	0.618691
PELI3	BC021256	PLSLPGPHKLPIPLPKP	2.52188e-22	2D, 4L	1.29743	0.0770169
MIB2	AB074480	YTNHRGRSPLDLAAEGR	1.06598e-22	2E, 4M	2.2106	0.401268
FARP2	NM_014808	SPSSRKSPLSLSPAFQV	2.51017e-22	2F, 4N	2.21287	0.214868
MAP3K4	NM_005922	DTLAEEKSIILQLLNAA	3.23763e-25	2G, 4O	1.38056	0.663949
TRAF3IP2	NM_015524	PQPHRNRAGLDLPTIDT	6.16456e-25	2H, 4P	0.444502	0.0298819
MYD88	NM_002468	NMRVRRRLSLFLNVRTQ	5.08577e-24	2I, 4Q,	1.19601	0.648408
ECT2	NM_018098	TPELKKSVSMLSLNTPN	7.02701e-24	2J, 4R	0.778139	0.2216
TNFRSF1A	NM_001065	ELLGRVLRDMDLLGCLE	4.81097e-25	2K, 4S	0.245472	0.0279252
TNFRSF10B	NM_003842	PREARGARPGLRVPKTL	1.36091e-25	2L, 4T	2.1289	0.0678089
CASP8	NM_001228	EDLASLKFLSLDYIPQR	7.02792e-25	2M, 5A	1.02629	0.376133
PPM1J	NM_005167	EARASFSRPTFLQLSPG	2.51189e-22	2N, 5B	2.9467	1.02558
GLI3	NM_000168	RLSARPSRKRTLSISPL	2.54951e-18	2O, 5C	1.92856	0.754929
IGF2AS	CR595930	PPAGRRRRGADLALAPL	6.07236e-19	2P, 5D	1.73783	0.829027
NEIL1	NM_024608	SASARGKELRLILSPLP	5.4852e-19	2Q, 5E	1.97722	0.00281084
PIF1	AF108138	YATLRRGRSLSLESPDD	3.00365e-19	2R, 5F	1.3312	0.602863
FLJ22184	AK096643	TSVSGPRLTLALAPGPP	2.85769e-19	2S, 5G	1.16519	0.264724
KIAA1522	NM_020888	GRRRRERRSTVLGLPQH	1.65626e-19	2T, 5H	1.02616	0.540661
IRGQ	NM_001007561	TALARRERALGLASGEL	9.43972e-20	3A, 5I	1.81995	0.125576
LOC388692	AK124550	RPRPGRTLRVTTLPTAP	9.43972e-20	3B, 5J	2.38667	1.03973
MLL4	NM_014727	LRSTRRATSLELPMAMR	4.27215e-20	3C, 5K	1.60849	0.528459
H6PD	NM_004285	SQPHRRMSLSLPLINRA	3.37547e-20	3D, 5L	1.29311	0.627213
PLEKHA6	NM_014935	SMKEKRRSLQLPASPAP	3.36048e-20	3E, 5M	1.17583	0.450221
ZNF335	NM_022095	SPPATSKALGLAVPPSP	3.35944e-20	3F, 5N	0.226802	0.0138825
C1orf24	NM_052966	SSLAKGESLSLPGPSPP	3.29582e-20	3G, 5O	0.0805828	0.0240128
ARHGAP5	BC075799	PLRRRRRRPTLLGLCTE	2.74299e-20	3H, 5P	1.13066	0.336921
MKK7 DS1	NM_145185	ENREARRRIDLNLDISP	1.9582e-18	6E, 8P	2.60919	0.468545
MKK7 DS3	NM_145185	TPPARPRHMLGLPSTLF	1.9582e-18	6F, 8Q	3.27823	0.76314
JUNB	NM_002229	DYKLLKPSLAVNLADPY	7.77784e-22	6G, 8R	1.56506	0.27082
NFATC3	NM_004555	FLERPSRDHLYLPLEPS	6.05821e-20	6H, 8S	2.22224	0.451143
ATFa	NM_001880	LAVHKHKHEMTLKFGPA	1.78372e-18	6I, 8T	1.82792	0.408099
c-JUN	NM_002228	NPKILKQSMTLNLADPV	2.50934e-21	6J, 9A	1.09056	0.262303
ELK1	NM_001114123	PQKGRKPRDLELPLSPS	7.73433e-19	6K, 9B	2.36758	0.0806067
NET	NM_005230	SVSAKISSLMLPNAASG	3.43816e-25	6L, 9C	2.40469	1.0424
GR	NM_000176	TWRIMTTLNMLGGRQGG	1.46013e-26	6M, 9D	8.13668	2.79846
MAPK8IP1	NM_005456	TYRPKRPTTLNLFPQVG	2.43259e-14	6N, 9E	8.19268	0.179793	JIP-1
MAPK8IP2	AF136382	EPHKHRPTTLRLTTLGG	3.32721e-17	6O, 9F	4.89028	0.021201	JIP-2
MAPK8IP3	NM_015133	GRSRKERPTSLNVFPLG	9.22543e-18	6P, 9G	8.40048	0.917703	JIP-3
SAB	NM_004844	PAVVRPGSLDLPSPVSG	3.93289e-20	6Q, 9H	1.1211	0.0266791
IRS1	NM_005544	TNSRLARPTRLSLGDPG	5.03388e-26	6R, 9I,	6.86245	0.628762
BARR2	NM_012911	FLMSDRRSLHLEASLDG	6.70891e-26	6S, 9J	2.83663	0.687416
JSAP1a	NM_013931	PGRRKERPTSLNVFPLG	9.22543e-18	6T, 9K	6.84327	0.214357
SPAG9	NM_003971	SRIRKERPISLGIFPLG	4.37774e-20	7A, 9L	11.5981	2.04575
NFATC3	NM_004555	FLERPSRDHLYLPLEPS	6.05821e-20	7B, 9M	3.04183	0.298013
SPAG9	NM_003971	HSRIRKERPISLGIFPL	4.37774e-20	7C, 9N	8.00592	1.19663
PICLO	NM_0014510	SSSARTKPTSLPISQSR	2.38347e-20	7D, 9O	4.75504	0.350646
ARG1	NM_000045	SYLLGRKKRPIHLSFDV	2.28358e-20	7E, 9P	7.67363	0.895303
CUX2	NM_015267	ASESSRCSLEVSLNSPS	2.03176e-20	7F, 9Q	0.776894	0.231553
LETM1	NM_012318	SLLILSRAMYLPDTLSP	1.40644e-20	7G, 9R	4.09764	1.23977
AHCTF1	NM_015446	SKASQKISRLLDLVVQP	1.36079e-20	7H, 9S	3.33538	1.18493
C21orf87	AF426265	RTGPRRPVREMTLPSDP	1.3266e-20	7I, 9T	1.41801	0.286448
FAM180A	NM_205855	PAAHRPKRSSSLPLNPV	1.24611e-20	7J, 10A	2.73836	0.595895
DOPEY2	NM_005128	LLGVLKESVQLNLAPPG	1.14251e-20	7K, 10B	0.785565	0.196226
LGR4	NM_018490	ISPEIMKSVTLIFFPLP	1.03788e-20	7L, 10C	2.27945	0.00841516
CDAN1	NM_138477	SGSPSRPSLTLSDPPNL	9.77807e-21	7M, 10D	0.466829	0.105606
SNX5	BC002724	REAPVRPGRPLSLVFTE	8.96752e-21	7N - 1, 10E - 1	2.3501	0.834855
DLEC1	NM_005106	FAARPRRLTQLALAQRP	2.0992e-21	7N - 2, 10E - 2	6.59757	0.619867
PDE4D	NM_006203	NIQRPTSLPLKILPLIA	8.78017e-21	7O, 10F	1.95361	0.690859
PDE4B	NM_002600	EGDGISRPTTLPLTTLP	8.66711e-21	7P, 10G	0.699837	0.178717
RUSC1	NM_001105203	LAQKRKRGPGLPLVPQA	8.31363e-21	7Q - 1, 10H - 1	2.29999	0.403969
MLL2	NM_003482	ARKTDRPALHLRIPPQP	3.0537e-22	7Q - 2, 10H - 2	1.62791	0.142897
VASN	NM_138440	PVTPRPPRSLTLGIEPV	8.1528e-21	7R, 10I	0.870274	0.0951544
LAG3	NM_002286	SWGPRPRRYTVLSVGPG	7.67448e-21	7S, 10J	4.97529	0.852942
SHANK1	NM_016148	SPAPRPSSLPILPSGPL	6.34078e-21	7T, 10K	0.771544	0.0389377
KANK2	NM_015493	TAGRGRSELCLDLPDPP	6.32383e-21	8A, 10L	1.35756	0.164521
TAGAP	NM_054114	VQGKTKRPVDLKIKNLA	5.71994e-21	8B, 10M	3.46195	0.220167
TPM3	AK056889	GGQPGRHRETLSLKQIN	1.15059e-20	8C - 1, 10N - 1	2.85301	0.0520879
BCL11B	NM_022898	SAAKRIKVEKDLELPPA	2.01017e-21	8C -2, 10N - 2	1.0029	0.424737
SPAG9	NM_003971	LPRILRKERPISLGIFP	4.37774e-20	8D - 1, 10O - 1	6.53886	0.0782192
MYNN	NM_018657	MDVKPSDMTLPLALPLG	2.55901e-20	8D - 2, 10O - 2	0.628006	1.70632
PARD3	AB073671	FVKTRKSKSMDLGSSPS	7.88501e-21	8E, 10R	4.34922	0.418036	Artefact*
F-box only prot. 10	AF176705	SLFRRRRERRTLSVGPG	1.49883e-20	8F, 10S	17.9148	6.49406
PALLD	AB023209	APGPRSPLQLPLAPDAE	1.12262e-20	8G, 10T	0.378347	0.0330805
C14orf78	AB095939	MQGDLKATDLSIQPPSA	1.06447e-20	8H, 11A	0.166506	0.07475
MYO15B	AB058686	PEVPARPSLTLPADIDL	6.60183e-21	8I, 11B	0.337772	0.000119323
BMF	NM_022898	RPVPARRRPCLRLPPPA	5.63501e-21	8J - 1, 11C - 1	4.42762	2.74362
APC	NM_000038	DLLERLKELNLDSSNFP	2.18773e-22	8J - 2, 11C - 2	0.489716	0.3242
TRIP12	NM_004238	SLQHSRDDSLDLSPQGR	5.18701e-21	8K, 11D	1.30961	0.481556
GLI1				Not Done	ND
GLI2				Not Done	ND
*Artefact: This sequence is split in real protein
